1 *Research Article*

2 **Uncovering the core microbiome and distributions of palmerolide in *Synoicum adareanum* across**  
3 **the Anvers Island archipelago, Antarctica**

4 **Alison Murray**<sup>1\*</sup>, **Nicole Avalon**<sup>2</sup>, **Lucas Bishop**<sup>1</sup>, **Karen W. Davenport**<sup>3</sup>, **Erwan Delage**<sup>4</sup>, **Armand**  
5 **E.K. Dichosa**<sup>3</sup>, **Damien Eveillard**<sup>4</sup>, **Mary L. Higham**<sup>1</sup>, **Sofia Kokkaliari**<sup>2</sup>, **Chien-Chi Lo**<sup>3</sup>, **Christian**  
6 **S. Riesenfeld**<sup>1</sup>, **Ryan M. Young**<sup>4\*</sup>, **Patrick S.G. Chain**<sup>3\*</sup>, **Bill J. Baker**<sup>2\*</sup>

7 <sup>1</sup> Division of Earth and Ecosystem Science, Desert Research Institute, Reno, Nevada, USA;  
8 [Alison.murray@dri.edu](mailto:Alison.murray@dri.edu) (A.E.M.); [bishoplucas95@gmail.com](mailto:bishoplucas95@gmail.com) (L.B.); [mary.higham@dri.edu](mailto:mary.higham@dri.edu) (M.L.H.);  
9 [csriesenfeld@gmail.com](mailto:csriesenfeld@gmail.com) (C.S.R.)

10 <sup>2</sup> Department of Chemistry, University of South Florida, Tampa, Florida, USA; [neavalon@usf.edu](mailto:neavalon@usf.edu) (N.E.A.);  
11 [skokkaliari@usf.edu](mailto:skokkaliari@usf.edu) (S.K.); [ryan.young@nuigalway.ie](mailto:ryan.young@nuigalway.ie) (R.M.Y.); [bjbaker@usf.edu](mailto:bjbaker@usf.edu) (B.J.B.)

12 <sup>3</sup> Bioscience Division, Los Alamos National Laboratory, Los Alamos, New Mexico, USA;  
13 [kwdavenport@lanl.gov](mailto:kwdavenport@lanl.gov) (K.W.D.); [armand@lanl.gov](mailto:armand@lanl.gov) (A.E.K.D.); [chienchi@lanl.gov](mailto:chienchi@lanl.gov) (C-C.L.); [pchain@lanl.gov](mailto:pchain@lanl.gov)  
14 (P.S.G.C.)

15 <sup>4</sup> LS2N, Université de Nantes, CNRS, Nantes, France; [erwan.delage@univ-nantes.fr](mailto:erwan.delage@univ-nantes.fr) (E.D.);  
16 [damien.eveillard@univ-nantes.fr](mailto:damien.eveillard@univ-nantes.fr) (D.E.)

17 \* Correspondence: [alisonemurray@gmail.com](mailto:alisonemurray@gmail.com); [bjbaker@usf.edu](mailto:bjbaker@usf.edu), [pchain@lanl.gov](mailto:pchain@lanl.gov)

18 Received: date; Accepted: date; Published: date

19 **Abstract:** Polar marine ecosystems hold the potential for bioactive compound biodiscovery, based  
20 on their untapped macro- and microorganismal diversity. Characterization of polar benthic marine  
21 invertebrate-associated microbiomes is limited to few studies. This study was motivated by our  
22 interest in better understanding the microbiome structure and composition of the ascidian, *Synoicum*  
23 *adareanum*, in which the bioactive macrolide that has specific activity to melanoma, palmerolide A  
24 (PalA), was found. PalA bears structural resemblance to a combined nonribosomal peptide  
25 polyketide, that has similarities to microbially-produced macrolides. We conducted a spatial survey  
26 to assess both PalA levels and microbiome composition in *S. adareanum* in a region of the Antarctic  
27 Peninsula near Anvers Island (64° 46'S, 64° 03'W). PalA was ubiquitous and abundant across a  
28 collection of 21 ascidians (3 subsamples each) sampled from seven sites across the Anvers Island  
29 archipelago. The microbiome composition (V3-V4 16S rRNA gene sequence variants) of these 63  
30 samples revealed a core suite of 21 bacteria, 20 of which were distinct from regional  
31 bacterioplankton. Co-occurrence analysis yielded several potentially interacting subsystems and,  
32 although the levels of PalA detected were not found to correlate with specific sequence variants, the  
33 core members appeared to occur in a preferred optimum and tolerance range of PalA levels. Taking  
34 these results together with an analysis of biosynthetic potential of related microbiome taxa indicates  
35 a core microbiome with substantial promise for natural product biosynthesis that likely interact with  
36 the host and with each other.

37 **Keywords:** Antarctica; ascidian; microbiome; microbial diversity; palmerolide A; co-occurrence  
38

## 39 1. Introduction

40 Microbial partners of marine invertebrates play intrinsic roles in the marine environment at  
41 both the individual (host survival) and community (species distribution) levels. Host-microbe  
42 relationships are mediated through complex interactions that can include nutrient exchange,  
43 environmental adaptation, and production of defensive metabolites. These functional interactions  
44 are tied to the structural nature (diversity, biogeography, stability) of host and microbiome, and the  
45 ecological interactions between them. Studies of sponges, corals, and to a lesser degree, ascidians  
46 have revealed strong trends in invertebrate host species specificity to particular groups of bacteria  
47 and archaea. These studies have documented an underlying layer of diversity (e.g., [1-3]) in which

48 habitat and biogeography appear to have strong influences on the microbiome structure and  
49 function [4-6].

50 The vast majority of host-microbiome studies have been conducted at low- and mid-latitudes  
51 from coastal to deep-sea sites. High latitude benthic marine invertebrate-associated microbiome  
52 studies are currently limited to the Antarctic, where just the tip of the iceberg has been investigated  
53 for different host-microbe associations [7] and ecological understanding is sparse. Antarctic marine  
54 invertebrates tend to have a high degree of endemism at the species level, often display  
55 circumpolar distribution, and in many cases have closest relatives associated with deep-sea fauna.  
56 Whether endemism dominates the microbiomes of high latitude benthic invertebrate is currently  
57 not known, nor is the extent of diversity understood within and between different host-associated  
58 microbiomes. Likewise, reports of core (conserved within a host species) microbiomes within  
59 Antarctic invertebrate species are sparse.

60 The few polar host-associated microbiome studies to date have documented varying trends in  
61 host-species specificity, with generally low numbers of individuals surveyed. For example, low  
62 species-specificity was reported in sponge microbiome compositions between different sub-  
63 Antarctic and South Shetland Island *Mycale* species [8] which shared 74% of the OTUs, possibly  
64 representing a cross-*Mycale* core microbiome. On the contrary, high levels of microbiome-host  
65 species specificity and shared core sequences within a species was observed in five McMurdo  
66 Sound sponge species [9]. The same was found across several Antarctic continental shelf sponge  
67 species [10]. Webster and Bourne [11] also found conserved bacterial taxa dominated by  
68 microorganisms in the class Gammaproteobacteria across the soft coral, *Alcyonium antarcticum*,  
69 sampled at three sites in McMurdo Sound. Another cnidarian, the novel ice shelf burrowing sea  
70 anemone *Edwardsiella andrillae*, contained novel microbiota, though the composition across a  
71 limited set of individuals was only moderately conserved in which some specimen were dominated  
72 by an OTU associated with the phylum Tenacitales and others, a novel OTU in the class  
73 Alphaproteobacteria [12]. Lastly, a single representative of the Antarctic ascidian *Synoicum*  
74 *adareanum* revealed limited rRNA gene sequence diversity, including the phyla Actinobacteria,  
75 Bacteroidetes, several Proteobacteria, Verrucomicrobia, and TM7 [13], though persistence of these  
76 taxa across individuals was not studied.

77 *Alcyonium antarcticum* (= *A. paessleri*) and *Synoicum adareanum* are both reported to be rich in  
78 secondary metabolites. The soft coral *A. antarcticum* produces sesquiterpenes that are unusual in  
79 bearing nitrate ester functional groups [14], while the ascidian *S. adareanum* is known to produce a  
80 family of macrolide polyketides, the palmerolides, which have potent activity against melanoma  
81 [15]. The role of the microbial community in contributing to host defensive chemistry, microbe-  
82 chemistry interactions and niche optimization, as well as microbe-microbe interactions, are  
83 unknown in these high latitude environments.

84 Here we have designed a study to investigate whether a core microbiome persists among *S.*  
85 *adareanum* holobionts that may inform our understanding of palmerolide origins. We conducted a  
86 spatial survey of *S. adareanum* in which we studied coordinated specimen-level quantitation of the  
87 major secondary metabolite, palmerolide A (PalA) along with the host-associated microbiome  
88 diversity and community structure across the Anvers Island archipelago (64° 46'S, 64° 03'W) on the  
89 Antarctic Peninsula (Figure 1). The results point to a core suite of microbes associated with PalA-  
90 containing *S. adareanum*, distinct from the bacterioplankton, which will lead to downstream testing  
91 of the hypothesis that the PalA producer is part of the core microbiome.

## 92 2. Results

### 93 2.1 Variation in holobiont PalA levels across ascidian colonies and collection sites.

94 Typical procedures for natural products chemistry samples utilize bulk specimen collections  
95 for chemistry extraction (~ 30 individual ascidian lobes per extraction in the case of *S. adareanum*).  
96 Prior to this study, variation in PalA content at the individual lobe or colony level (inset, Figure 1)  
97 was unknown. Our sampling design addressed within and between colony variation at a given  
98 sampling site, as well as between site variation. The sites were constrained to the region that was

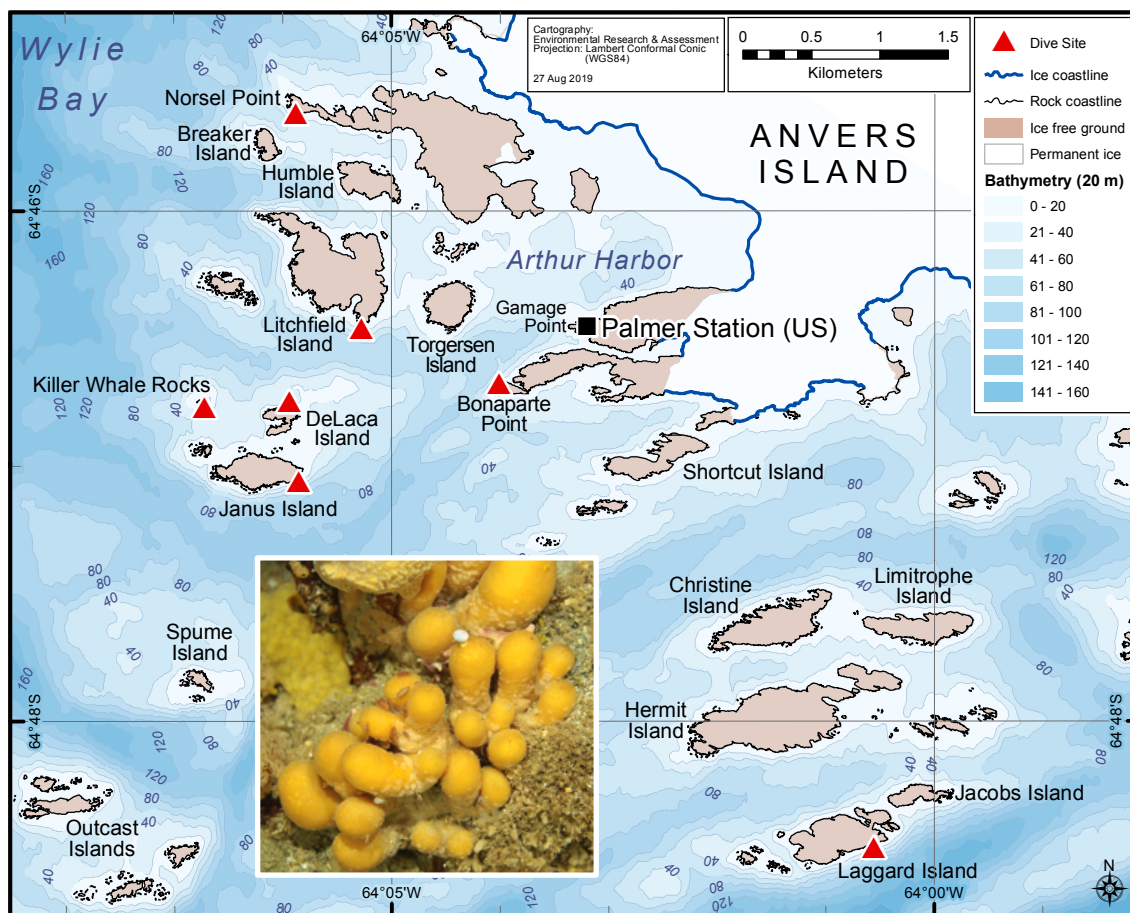

99

100 **Figure 1.** Bathymetric map of the study area off Anvers Island. *Synoicum adareanum* collection sites  
101 are shown with red triangles. The map was generated by Environmental Research & Assessment,  
102 Cambridge, UK, using Arthur Harbor bathymetry data from the PRIMO survey project 2004-06 (Dr.  
103 Scott Gallagher and Dr. Vernon Asper). Inset: Colonial ascidian, *S. adareanum*, which occurs in clusters  
104 of multiple lobes connected by a peduncle which together comprise a colony on the seafloor, collected  
105 at depths ranging from 24-31 m. Sampling site abbreviations in text: Bonaparte Point (Bon); DeLaca  
106 Island (Del); Janus Island (Jan); Killer Whale Rocks (Kil); Laggard Island (Lag); Litchfield  
107 Point (Nor).

108 logistically accessible by zodiac in the Anvers Island Archipelago off-shore of the United States  
109 Antarctic Program (USAP)-operated Palmer Station. *S. adareanum* colonies were sampled across  
110 seven dive sites (Figure 1) in which three lobes per multi-lobed colonies were sampled at three  
111 colonies per dive site, totaling 63 lobes for PaLA comparison. PaLA stands out as the dominant peak  
112 in all LC/MS analyses of the dichloromethane:methanol soluble metabolite fraction of all samples  
113 analyzed (e.g., Figure 2a). The range in PaLA levels varied about an order of magnitude 0.49 -4.06  
114 mg PaLA per g host dry weight across the 63 lobes surveyed. Our study design revealed lobe-to-  
115 lobe, intra-site colony level and some site-to-site differences in PaLA levels ( $p < 0.05$ ) in the  
116 archipelago (Figures 2b, S2). Within a given colony, the lobe-to-lobe variation was often high and  
117 significantly different in 17/21 colonies surveyed. Significant differences in PaLA levels between  
118 colonies were also observed within some sites (Janus Island (Jan), Bonaparte Point (Bon), Laggard  
119 Island (Lag), and Litchfield Island (Lit); see Figure 1) in which at least one colony had significantly  
120 different levels compared to another colony or both. Despite this, we found differences between  
121 some of the sites. Namely Bon was significantly lower than all six other sites. This site is the closest  
122 to the largest island, Anvers Island, and Palmer Station. Samples from Killer Whale Rocks (Kil) and  
123 Lit sites were also found to have significantly higher PaLA levels than Jan, Bon and Norsel Point

124 (Nor), although these did not appear to have a particular spatial pattern or association with sample  
125 collection depth.

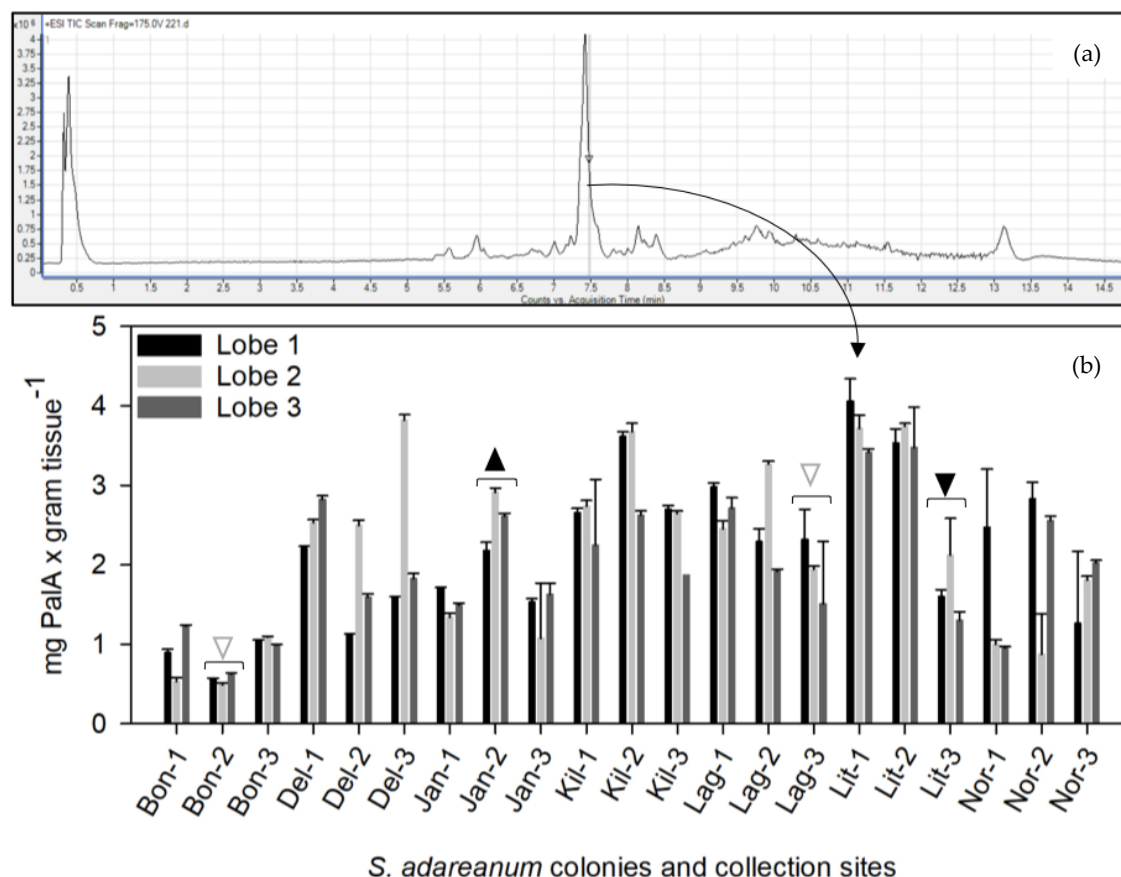

126

127 **Figure 2.** Palmerolide A (PaA) detection in *S. adareanum* holobionts. (a) Mass spectra derived from  
128 sample Lit-1a. The PaA peak dominates the dichloromethane-methanol fraction of the *S. adareanum*  
129 extract. (b) Levels of PaA normalized to tissue dry weight detected by mass spectrometry in *S.*  
130 *adareanum* holobiont tissues (three lobes per colony) surveyed in three colonies per site across the  
131 Anvers Island archipelago. Error represents individual lobe technical replication (standard  
132 deviation). Colonies with significant differences in PaA levels within a site are indicated with  
133 triangles, in which the direction of point indicates a significantly higher or lower colony. Filled  
134 triangles = significance ( $p < 0.05$ ) in comparison to the other two colonies, and open triangles are those  
135 that were different from only one of the two colonies. Most colonies had significant lobe-lobe  
136 differences in PaA concentration, and some site-level differences were observed (Figure S2).

137 2.1. Characterization of host-associated cultivated bacteria.

138 Given our interest in identifying a PaA producing microorganism, we executed a cultivation  
139 effort with *S. adareanum* homogenate on three different marine media formulations at 10 °C. 16S  
140 rRNA gene sequencing revealed seven unique isolates (of 16 brought into pure culture) at a level of  
141 > 99% sequence identity. All but one of the isolates was affiliated with the class  
142 Gammaproteobacteria, including five different genera commonly isolated from marine  
143 environments (*Shewanella*, *Moritella*, *Photobacterium*, *Psychromonas* and *Pseudoalteromonas*, of which  
144 nine were highly related). In many cases, we characterized their near neighbors as marine  
145 psychrophiles, many from polar habitats (Figure S1). The exception to this was the isolation of a  
146 cultivar associated with the Alphaproteobacteria class, *Pseudovibrio* sp. str. TunPSC04-5.I4, in which  
147 its two nearest neighbors were isolated from a marine sponge and a different ascidian. This result  
148 marks the first *Pseudovibrio* sp. cultivated from high latitudes. HPLC screening results of biomass  
149 from all sixteen isolates did not reveal the presence of PaA.

150



151 2.2 *Synocicum adareanum* microbiome (SaM).

152 To understand the nature of conservation in the composition of the host-associated  
 153 microbiome of *S. adareanum* we identified the microbiome structure and diversity (based on the V3-  
 154 V4 region of the 16S rRNA gene) with sections of the 63 samples used for holobiont PaLa  
 155 determinations. It resulted in 461 amplicon sequence variants (ASVs) distributed over 14 bacterial  
 156 phyla (Table 1). The core suite of microbes, defined as those present in > 80% of samples (referred to  
 157 as the Core80), included 21 ASVs (six of which were present across all 63 samples). The Core80  
 158 ASVs represented the majority of the sequenced iTags (95% on average across all 63 samples), in  
 159 which the first four ASVs dominated the sequence set (Figure 3). The ASVs present in 50-79% of  
 160 samples represented the Dynamic50 category and contained 14 ASVs, which represented only 3.3%  
 161 of the data set. The remaining ASVs fell into the Variable fraction, which included 426 ASVs,  
 162 representing 1.7 % of the iTag sequences, yet the majority of phylogenetic richness (Table 1).  
 163 Comparative statistical analyses were conducted with the complete sample set, which was  
 164 subsampled to the lowest number (9987) of iTags per sample. This procedure was limited by one  
 165 sample (Bon1b) that underperformed in terms of iTag sequence yield. After the elimination of this  
 166 sample from the analysis, the 62-sample set had 19,003 iTags per sample with a total of 493 ASVs,  
 167 the same 21 sequences in the Core80 (with seven common to all 62 samples), the same 14  
 168 Dynamic50 sequences, and a total of 458 Variable ASVs.

169 **Table 1.** Relative proportions (average +/- standard deviations, n=63) of Phyla (and class for the  
 170 Proteobacteria) across the different microbiome fractions.

| Phyla or Class      | Whole Community | Core80       | Dynamic50     | Variable      |
|---------------------|-----------------|--------------|---------------|---------------|
| Proteobacteria      |                 |              |               |               |
| Gammaproteobacteria | 71.99 ± 6.64    | 73.28 ± 6.33 | 51.3 ± 23.16  | 43.71 ± 23.63 |
| Alphaproteobacteria | 22.9 ± 5.39     | 23.83 ± 5.93 |               | 23.83 ± 19.7  |
| Deltaproteobacteria | 0.17 ± 0.1      | 0.16 ± 0.1   |               | 1.11 ± 2.00   |
| Bacteroidetes       | 2.83 ± 2.14     | 0.79 ± 0.69  | 46.55 ± 22.91 | 17.4 ± 14.69  |
| Verrucomicrobia     | 1.56 ± 2.8      | 1.59 ± 2.93  |               | 2.83 ± 3.97   |
| Nitrospirae         | 0.27 ± 0.23     | 0.29 ± 0.24  |               | 0.02 ± 0.17   |
| Planctomycetes      | 0.12 ± 0.13     |              | 2.15 ± 3.06   | 4.6 ± 12.84   |
| Actinobacteria      | 0.1 ± 0.08      | 0.05 ± 0.05  |               | 3.15 ± 3.53   |
| Patescibacteria     | 0.02 ± 0.09     |              |               | 0.84 ± 2.05   |
| Dadabacteria        | 0.02 ± 0.03     |              |               | 1.22 ± 2.03   |
| Uncl. Bacteria      | 0.009 ± 0.017   |              |               | 0.72 ± 1.53   |
| Dependentiae        | 0.004 ± 0.018   |              |               | 0.34 ± 1.99   |
| Chlamydiae          | 0.002 ± 0.006   |              |               | 0.19 ± 0.83   |
| Acidobacteria       | 0.000 ± 0.003   |              |               | 0.02 ± 0.13   |
| Chloroflexi         | 0.000 ± 0.003   |              |               | 0.02 ± 0.13   |
| Epsilonbacteraeota  | 0.000 ± 0.001   |              |               | 0.01 ± 0.07   |

171 ASV11 most closely matched a sequence in the Nitrospirae family from Arctic marine sediments.  
 172 There were two Verrucomicrobium-affiliated sequences represented in different families  
 173 (Puniceicoccaceae, SaM\_ASV14, and Opitutaceae, SaM\_ASV15). Lastly, there were two ASVs  
 174 affiliated with the phylum Bacteroidetes: one related to polar strain, *Brumimicrobium glaciale*  
 175 (SaM\_ASV19), and the other to a marine *Lutibacter* strain (SaM\_ASV12).

176 Five Dynamic50 ASVs were affiliated with the marine Bacteroidetes phylum (Cryomorphaceae  
 177 and Flavobacteriaceae-related), in addition to six ASVs associated with the class  
 178 Gammaproteobacteria (including four additional *Microbulbifer*-related sequences). There was also  
 179 two additional phyla, an ASV related to a sponge-affiliated Verrucomicrobium isolate, and a  
 180 Planctomycetes-related ASV (Table 1, Figure S1). A number of these ASVs were most closely  
 181 related to isolates from marine sediments.

182 Interestingly, five sequences identified from earlier cloning and sequencing efforts with this  
 183 host-associated microbiome (Figure S1; [13]) matched sequences in the Core80 and Dynamic50 data  
 184 sets. Phylogenetic comparisons also revealed that the SaM isolates were distinct from the Core80

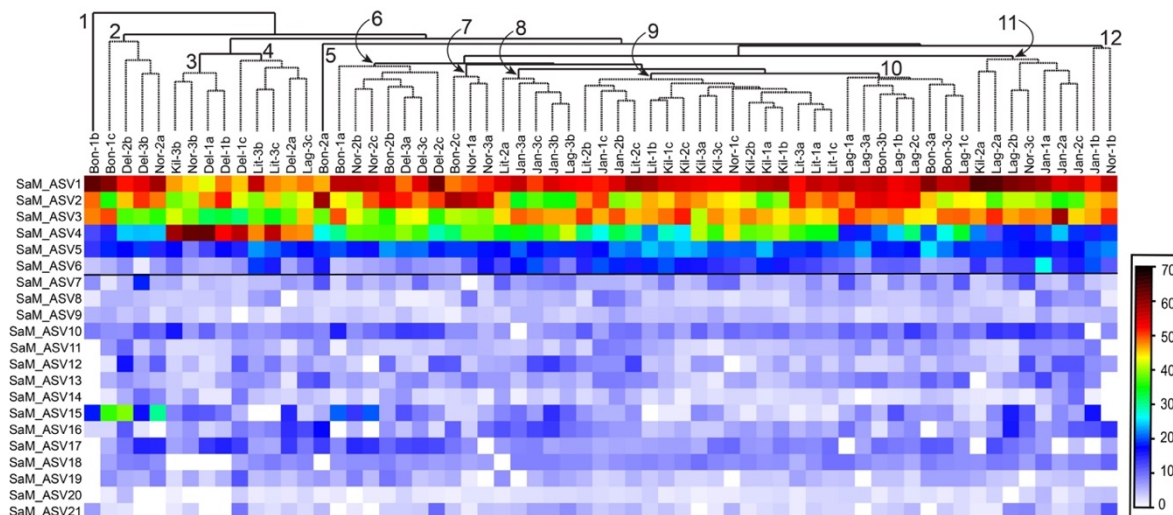

185

186

187

188

189

190

191

**Figure 3.** Heatmap of square root transformed ASV occurrence data for the core microbiome. ASVs (ranked and numbered) are shown on the y-axis, and 63-samples were hierarchically clustered, shown on the x-axis (site-based; square root transformed abundance data). Nodes with significant clusters are indicated from left to right ( $p < 0.05$ ); order of clustering inside the node was not significant. The horizontal line drawn below SaM\_ASV6 demarcates those ASVs that were present in all 63 samples.

192

and Dynamic50 except for the *Pseudovibrio* sp. TunPSC04-5.I4 isolate, which was present in both the Core80, and the clone and sequencing study.

194

The hierarchical clustering of Core80 ASVs (based on Bray-Curtis similarity) across all 63 samples did not reveal strong trends in site or colony specific patterns (Figure 3). There were eight instances where 2 of 3 lobes paired as closest neighbors, and 4 of 8 primary clusters that included three lobes derived from the same colony. Sample Bon1b clustered apart from them all. In some cases, clusters could be attributed to specific ASVs. For example, cluster 2 (Figure 3) had the highest relative levels of SaM\_ASV15 (an Opatutaceae family-affiliated sequence), whereas cluster 3 (Figure 3) had the highest relative levels of ASV4 (affiliated with *Microbulbifer* spp.).

201

Overall the community structures in the *S. adareanum* microbiomes across the 63 lobes surveyed had a high degree of similarity. Bray-Curtis pairwise similarity comparisons between lobes and colonies within each site were higher than 54% in all cases. When comparing the averages of pairwise similarity values within and between colonies, all sites, other than Lag, had higher similarity values within lobes in the same colony (ranging from 69.9 - 82.2%) compared to colonies within a site (66.5-81.0%; Figure S3), although the differences were small, and only Bon and Jan were significantly different ( $p < 0.05$ ). We performed a two-dimensional tmMDS analysis based on Bray-Curtis similarity to investigate the structure of the microbiome between sites (Figure 4a). The microbiomes sampled at Kil and Lit had the highest overall degree of clustering (>75% similarity) while Kil, Lag, Lit, and Jan samples all clustered at a level of 65%. The microbiomes from DeLaca Island (Del) were the most dissimilar which was supported by SIMPER analysis in which two of the most abundant ASVs in the Core80 were lower than the average across other sites (SaM\_ASV1 and 3) while others in the Core80 (SaM\_ASV4, 15, and 17) were higher than the average across sites. We also performed a 2D tmMDS on the SaM fractions (Core80, Dynamic50, Variable) with and without permutational iterations which showed similar trends although partitioning of community structures between sites was more evident with the permutations (Figure S4). Site-based clustering patterns shifted to some degree in the different SaM fractions. For the Core80 alone, Jan samples clustered apart from the others. For Dynamic50, both Jan and Kil were outliers. Finally, for Variable fraction, Kil and Del samples clustered apart from the other sites. Variable fraction was more homogeneous, obscuring any site-to-site variability, while the core displayed tighter data clouds that showed a modest level of dispersion.

221

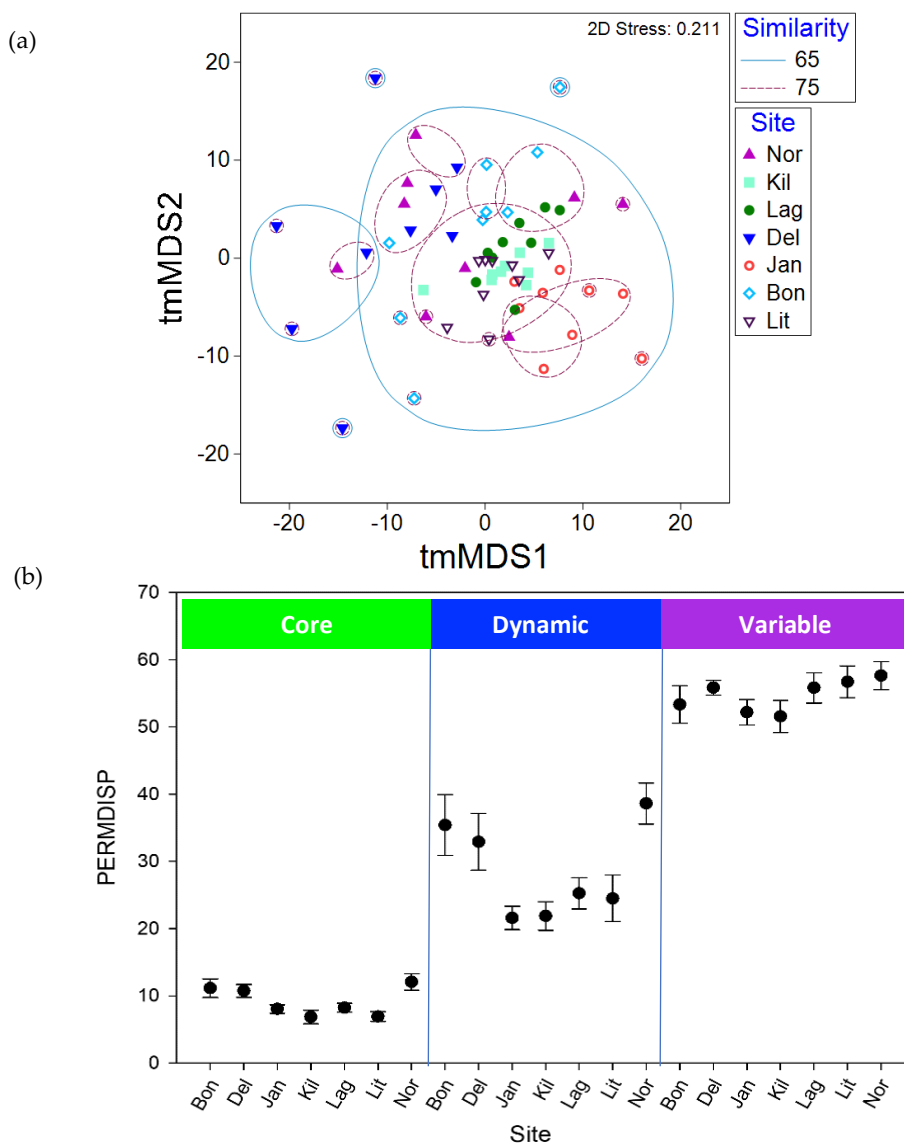

222  
223  
224  
225  
226  
227  
228  
229  
230  
231  
232  
233

**Figure 4.** Similarity relationships amongst the *S. adareanum* microbiome samples in the Anvers Island archipelago. (a) tmMDS of Bray-Curtis similarities of square root transformed ASV occurrence data representing the microbiome of the 63 *S. adareanum* lobe samples using the complete ASV occurrence profiles. Microbiome samples with significant levels of similarity are shown (see legend). (b) B-diversity across Anvers Island archipelago sites represented by PERMDISP (9999 permutations) reveals differences between the highly persistent core, dynamic and variable portions of the *S. adareanum* microbiome (standard error shown). The degree of dispersion (variance) around the centroid changes significantly ( $p < 0.0001$ ) for the different microbiome classifications, which the lowest levels of dispersion are found in the core microbiome.

243 A PERMANOVA analysis investigated the drivers of variability in community structure in  
244 which we tested the role of colony-level, site-level, and stochastic environmental variation. When  
245 evaluating the whole community (all sites and ASVs), site-to-site differences explained 25% of the  
246 variability in the microbiome (Table S1). Colony-to-colony differences explained 28%, while the  
247 remaining 47% of the variability was unexplained and is likely attributed to stochastic  
248 environmental variation. When the SaM fractions were analyzed separately, the most significant  
249 difference ( $p < 0.05$ ) was in the Variable fraction of the microbiome in which the site-to-site  
250 differences explained only 19.2% of the variation and the residual (stochastic) level increased to  
251 58.4% (Table S1). Conversely, PERMDISP (Figure 4), a measure of dispersion about the centroid  
252 calculated for each site (a measure of  $\beta$ -diversity), revealed differences in the community structures

253 in each SaM fraction across sites, as well as differences between the microbiome fractions. The  
254 Core80 had a low level of dispersion (PERMDISP average of 9.1, range: 6.8-12.1), compared to the  
255 Dynamic50 (average 28.6, range: 24.5-38.6), which were moderately dispersed about the centroid,  
256 and were more variable with differences between the sites more apparent; Bon, Del, and Nor had  
257 higher values compared to the other four sites. The Variable fraction had high PERMDISP values  
258 (average 54.7, range: 51.6-57.6), representing high differences in  $\beta$ -diversity in which values were  
259 relatively close across the seven sites.

### 260 2.3 ASV co-occurrences, and relationship to PalA.

261 To further investigate the ascidian-microbiome ecology, we performed a network analysis of  
262 the ascidian holobiont with a particular emphasis on ASV co-occurrence and ASV ecological niche  
263 associated with PalA. The co-occurrence network depicted a sparse graph with 102 nodes and 64  
264 edges (average degree 1.255; diameter 15; average path length 5.81) that associated ASVs from  
265 similar SaM fractions (assortativity coefficient of 0.41), confirming the robustness of the above  
266 discrimination. Upon inspection of the co-occurrence network, a dominant connected component  
267 contained 42.1% of ASVs, in which we identified three highly connected modules (via the  
268 application of an independent network analysis WGCNA, soft threshold = 9, referred to here as  
269 subsystems; Figure 5). The three subsystems were not significantly associated with PalA (resp.  
270 Corr= -0.23; 0.033; -0.17 for subsystems 1, 2 and 3). The network also contained several smaller  
271 systems (2-6 nodes), and 30 singletons, only one of which was in the Core80 (Gammaproteobacteria  
272 class, *Endozoicomonas*-affiliated). The three subsystems included ASVs from the Core80, Dynamic50  
273 and Variable SaM fractions, but were unevenly distributed. Mostly driven by Core80 SaM fractions,  
274 Subsystem 1 harbored most of the highly represented ASVs, including the *Microbulbifer*-related  
275 ASVs as well as the *Pseudovibrio* ASV. Subsystem 2, interconnecting Subsystems 1 and 3, is mostly  
276 driven by Variable fraction ASVs and includes lower relative abundant Core80 *Hoeflea* and the  
277 Opitutaceae ASVs, as well as several Bacteroidetes taxa. Finally, Subsystem 3 was smaller. It  
278 included several diverse taxa dominated by Dynamic50 fraction, but still including two  
279 representatives from the Core80, *Lentimonas*, and Cryomorphaceae-affiliated ASVs. The overall role  
280 of Variable ASVs in the network is surprising, as they appear to be critical nodes linking the  
281 Subsystems, via 13 edges that lie between Subsystems 2 and 3. Another, perhaps noteworthy  
282 smaller connected component is in the lower left of the graph in which three Core80 ASVs,  
283 including the chemoautotrophic ammonia and nitrite oxidizers, *Nitrosomonas* and *Nitrospira*, were  
284 linked along with an uncharacterized Rhodospiralles-related ASV, and a Variable ASV.

285 To address the first-order question as to whether there was a relationship between the PalA  
286 concentration levels detected in the LC/MS analysis and the semi-quantitative ASV occurrences of  
287 *S. adareanum* ASVs, we performed three complementary analyses: correlation analysis, weighted co-  
288 occurrence networks analysis (WGCNA) and niche robust optima with PalA concentration as a  
289 variable. Pearson correlations between ASV occurrences and PalA concentrations ranged from -0.33  
290 to 0.33 at the highest (24 of which were significant,  $\leq 0.05$ ; although none of those with a significant  
291 relationship were part of the core microbiome and were present in < 50% of the samples with a high  
292 occurrence of 24 sequences), suggesting little relationship at the gross level of dry weight  
293 normalized PalA and ASV relative abundance. This indicated that relative abundance of ASV is not  
294 a good predictor of PalA. A complementary WGCNA result showed no significant association  
295 between subsystem co-occurrence topology and PalA, pointing to the lack of relationship between  
296 microbial community structure and PalA. Finally, another aspect of the relationship between ASV  
297 occurrence and PalA levels was explored using the robust optimum method, which estimates the  
298 ecological optimum and tolerance range for ASVs about PalA. In this case we calculated the PalA  
299 niche optimum for each ASV and ranked them based on the median (Figure S5). Core80 ASVs  
300 showed a consistent PalA niche range. Furthermore, the median optima values of the Dynamic50  
301 ASVs lie, for the most part, in lower or higher PalA optima compared to the Core80, with a  
302 substantial niche overlap between Core80. The Variable ASVs collectively lie at the lower and  
303 higher extremes of the optimum and tolerance range. Altogether, these complementary analyses



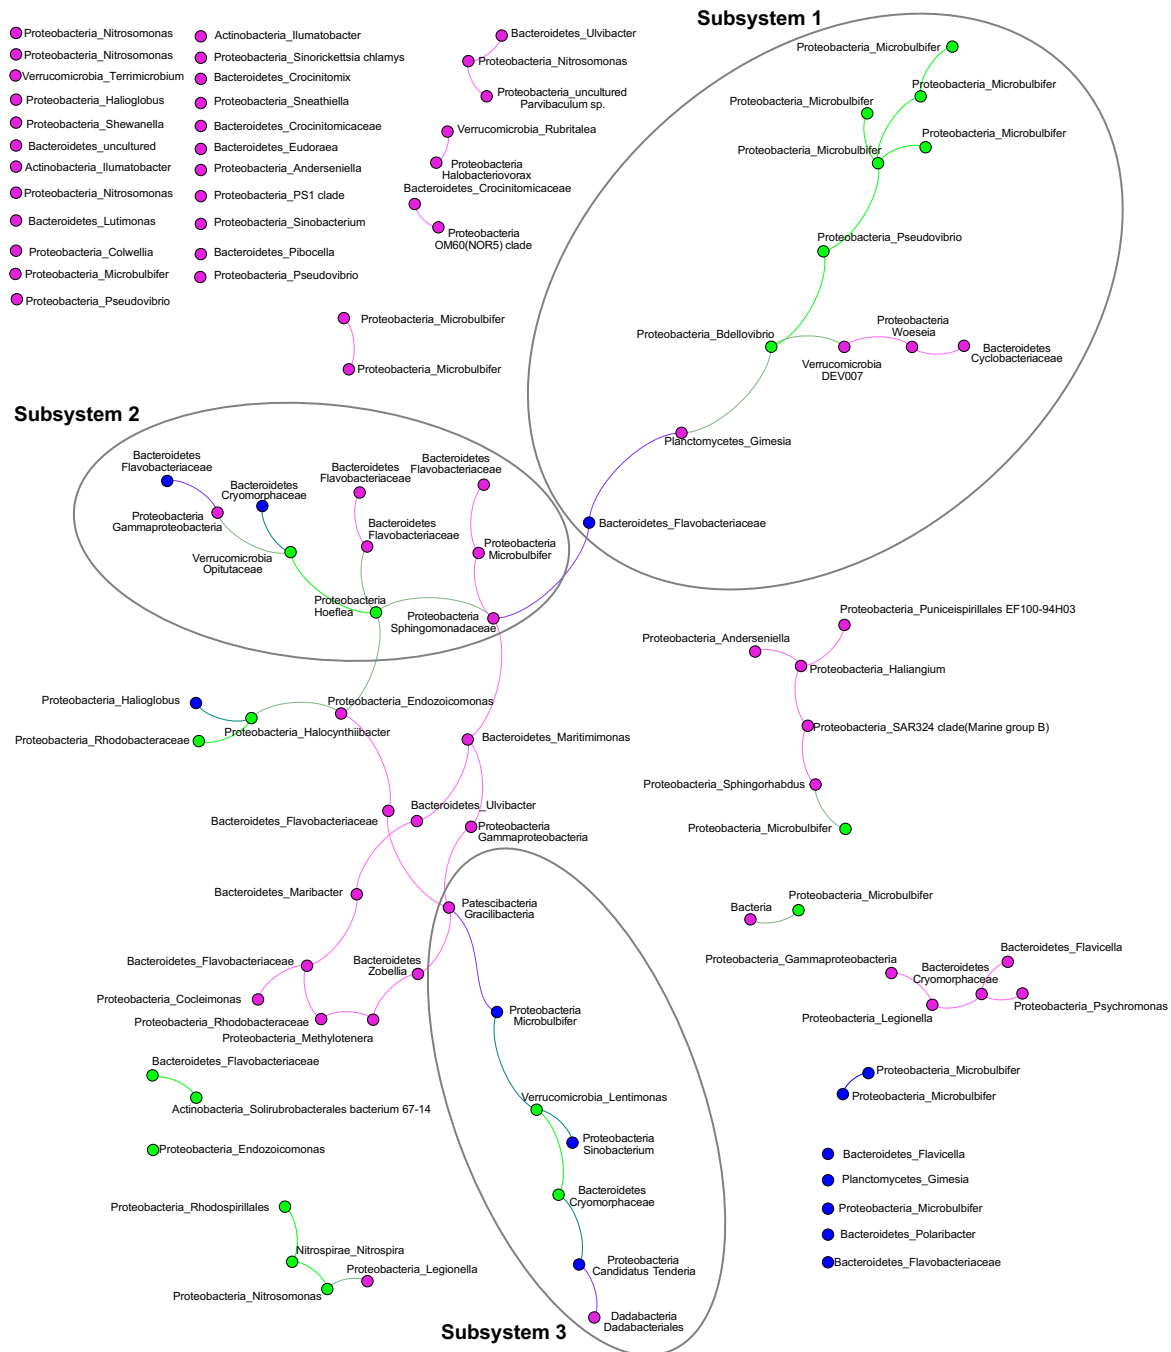

304 **Figure 5.** ASV co-occurrence network. The largest connected component of the co-occurrence  
 305 network (seeded with ASVs found in at least 5 samples, 102 in total) identified three subsystems.  
 306 Node colors represent the microbiome fractions (Core80, green; Dynamic50, blue; Variable, pink).  
 307 Taxonomic identities of the ASVs are shown next to the nodes, with the phylum\_highest level taxon  
 308 identified shown.

309 advocated for not considering an individual nor a community effect on PalA, but rather,  
 310 acclimation to the high levels of PalA observed that likely rely on unknown metabolic or  
 311 environmental controls.

### 312 2.4 Culture collection: microbiome and bacterioplankton comparisons.

313 To address whether the composition of the *Synoicum adareanum*-associated bacterial cultivars  
 314 were also present in the SaM or in the free-living bacterioplankton (< 2.5- $\mu$ m fraction), we  
 315 considered the overlap in membership between the isolate 16S rRNA gene sequences and these  
 316 other two data sets. Representation of isolates in the 16S rRNA gene ASV data set was estimated by

317 comparing the two sequence data sets, albeit different ascidian samples were used for the culture  
318 collection and the *S. adareanum* survey. Excepting *Pseudovibrio* sp. TunPSC04-5I4 that was present in  
319 the Core80 with a 100% sequence match, two other isolates also had 100% matches to sequences in  
320 the Variable SaM (BONS.1.10.24 and BOMB.9.10.19). Three other isolate 16S rRNA sequences  
321 (BOMB.3.2.14, BOMB.9.10.16, BOMB.9.10.21) were found to match sequences in the Variable  
322 microbiome at a level of 97% or higher. Only the *Pseudoalteromonas*-related isolate and the  
323 *Shewanella*-related isolate sequences were not detected with relatives at a level of at least 97%  
324 identity to the SaM ASVs; which could be explained by under-sampling. The bacterioplankton  
325 composition was dominated by Gammaproteobacteria ASVs (47.35% of all ASVs; Table S2) in  
326 which six of the isolates (BOMB.9.10.21, BONS.1.10.24, BOMB.9.10.16, BOMB.3.2.20, BOMB.3.2.14,  
327 BONSW.4.10.32) matched sequences in the bacterioplankton data set at > 99.2% identity; even at a  
328 level of 95% sequence identity the remaining ten isolates did not match sequences in the plankton,  
329 including the *Pseudovibrio* sp. str. TunPSC04-5I4 isolate.

#### 330 2.4 Microbiome:bacterioplankton comparisons.

331 Although at a high taxonomic level Proteobacteria and Bacteroidetes phyla dominated the  
332 microbiome and bacterioplankton (Table S2), the relative proportions varied and the taxa  
333 represented were quite different. Membership between SaM and the bacterioplankton data set  
334 indicated a low-level overlap at 100% identity (Figure S6), with 39 of 604 perfectly matched ASVs.  
335 At 100% ASV sequence identity, the results indicate a single, Core80 SaM ASV was a perfect match  
336 with the bacterioplankton data set – the *Microbulbifer*-associated sequence that is the most abundant  
337 across all 63 SaM data sets. Interestingly, this sequence was only identified in one bacterioplankton  
338 sample (IPY-225-9) at a low occurrence (14 of > 1.18 million tags distributed across 604 ASVs). There  
339 were three (of 14) Dynamic50 ASVs that were perfect matches with the bacterioplankton ASVs.  
340 These were affiliated with a poorly classified Bacteroidetes family Flavobacteraceae ASV (77% of  
341 SaM samples), a Gammaproteobacteria-associated *Sinobacterium* (73% of SaM samples), and a  
342 second Gammaproteobacteria-associated ASV that is associated with *Candidatus Tenderia* (71% of  
343 SaM samples). The remaining 35 perfect match ASVs between the two data sets were classified as  
344 part of the Variable microbiome. These sequences fell across four phyla and nine classes, 13 of  
345 which were well-distributed across the Bacterioplankton data set samples (>50%).

346 At a level of 97% ASV sequence identity, there were three additional matches between the  
347 Bacterioplankton data set and the Core80. These included an Alphaproteobacteria-related *Hoeflea*  
348 and *Halocynthibacter*-related sequences, and a *Nitrospira*-related sequence. There were also two other  
349 Dynamic50-related ASVs: these were both related to unclassified Flavobacteriaceae. The rest (79  
350 ASVs) of the matches at >97% were affiliated with the Variable fraction of the microbiome.

### 351 3. Discussion

352 This study reports our growing understanding of the microbiome composition of PalA-  
353 containing *S. adareanum*. To enhance our understanding of the ecology of the PalA-containing  
354 ascidian, *S. adareanum*, we investigated the ascidian colony microbiome and PalA chemistry levels  
355 at an individual lobe level, and compared the ascidian microbiome to the plankton. This  
356 comparison allowed us to address questions regarding variability in PalA content and whether a  
357 conserved core microbiome occurs across these PalA-containing Antarctic ascidians, thereby  
358 supporting the logic that if a microbial producer synthesizes PalA, the producing organism should  
359 be present in all PalA-containing *S. adareanum* samples. Before this study, however, we did not have  
360 quantitative data at the level of the individual ascidian lobe that forms the pedunculated *S.*  
361 *adareanum* colonies (Figure 1). This discussion focuses on the core microbiome, then takes a broader  
362 look at secondary metabolite distributions about the microbiome and in other marine invertebrates  
363 as well as the biosynthetic potential of core membership, and concludes with information gained  
364 from our initial cultivation effort.

365

### 366 3.1 Core microbiome.

367 Ascidian (host)-microbiome specificity is an active area of research. Compared to sponges and  
368 corals, for example, ascidian microbiomes are less-well characterized. To get a broader perspective  
369 on the microbiome we also used cultivation-independent approaches. We found that the Antarctic  
370 ascidian *S. adareanum* has a persistent core microbiome across the Anvers Island archipelago that is  
371 distinct from the plankton. This dissimilarity between ascidian host-associated microorganisms and  
372 bacterioplankton appears to be a consistent observation across the global ocean (e.g., [16-19]). The  
373 Core80 is comprised of ASVs that numerically dominate the community, as well as those  
374 representing only a fraction of a percent of the sequences surveyed. Although ascidian symbioses  
375 have not yet been systematically studied in the Antarctic, better-studied lower latitude ascidian  
376 microbiomes provide several examples for comparison. The overall trend across ascidian  
377 microbiome studies to date suggests that there is a high degree of both geographical as well as host-  
378 species level specificity of microbiome composition (e.g., [16, 17, 20]). The same appears to be true  
379 of *S. adareanum*. Though this study was restricted to a small geographical region, we identified a  
380 conserved core of 21 16S rRNA gene sequence types across 63 individual pedunculate lobes  
381 studied. We attribute the detection of this high degree of persistent members in part to the uniform  
382 homogenization, extraction, and sequencing methodological pipeline applied. Microbiome analysis  
383 is sensitive to sequencing depth, quality parameter choices, and algorithmic differences in data-  
384 processing pipelines (amplicon sequence variants vs. cluster-derived operational taxonomic units),  
385 which can impact direct comparisons between studies. Along these lines, the numerous highly  
386 related *Microbulbifer* ASVs would have fallen into a single OTU (97% sequence identity), resulting  
387 in a core with 14 members. These limitations aside, our findings are in line with several other  
388 ascidian microbiome studies from lower latitudes in terms of the relative size of core membership  
389 (where core definitions vary to some degree between studies). For example, *Styela plicata*, a solitary  
390 ascidian, was reported to have a core membership of 10 [21] to 16 OTUs [22]. Other solitary  
391 ascidians, including *Herdmania momus* had a core of 17 OTUs [21], while two *Ciona* species ranged  
392 from 8-9 OTUs [23]. Temperate colonial ascidians *Botryliodes leachi* and *Botryllus schlosseri* ranged  
393 from 10-11 members in their core microbiomes [20]. Also, an extensive survey of 10 different  
394 ascidian microbiomes (representing both solitary and colonial forms) conducted on the Great  
395 Barrier Reef reported core memberships ranging from 2 to 35 OTUs [16], while the numbers of  
396 individuals surveyed in each case were only 2-3. Note that a few other studies reported much  
397 higher numbers of shared OTUs ranging from 93-238 [18,19]; the scale of sequencing was higher in  
398 these later studies. Further, as others have reported [24], the membership of these core ascidian  
399 microbiomes is distinct, and in the case of SaM, the core microbiome diversity appears to be unique  
400 at the ASV level, although several taxa are in common with other ascidian-associated microbes at  
401 the genus level including *Microbulbifer* associated with *Cystodytes* sp. [25], *Pseudovibrio* with *Polycitor*  
402 *proliferus* [26] and an *Endozoicomonas* specific-clade was identified in a survey of a number of  
403 ascidians [27].

404 Predicted metabolic abilities of the Core80 taxa suggest aerobic heterotrophy (aerobic  
405 respiration – organic carbon is the carbon and energy source), microaerophily (growth in low  
406 oxygen conditions) and chemoautotrophy (CO<sub>2</sub> fixation provides carbon and reduced chemicals  
407 provide energy, e.g., NH<sub>4</sub><sup>+</sup> and NO<sub>2</sub><sup>-</sup>) are themes amongst the Core80, in which the most abundant  
408 ASVs are high molecular weight carbon degraders. The *Microbulbifer* genus has members known to  
409 degrade cellulose [28], and perhaps non-coincidentally, ascidians are the only known invertebrate  
410 capable of cellulose biosynthesis in the marine environment (e.g., [29, 30]). From this, we could  
411 speculate that the *Microbulbifer* strains associated with *S. adareanum* could occupy a commensal, if  
412 not somewhat antagonistic relationship [31]. In support of this possibility is the fact that the only  
413 overlapping sequence between the Core80 and the bacterioplankton was a *Microbulbifer* sequence,  
414 which was a rare sequence in the plankton – suggesting it may be an opportunistic member of the  
415 *S. adareanum* microbiome. Besides, free-living and sponge-associated isolates from the *Microbulbifer*  
416 genus have been found to produce bioactive compounds including pelagiomycins [32] and parabens

417 [33], respectively. This observation, in the least, suggests that the *Microbulbifer*(s) is/are likely well-  
418 adapted to their ascidian host and might be considered a potential PalA producing organism.

419 The NH<sub>4</sub><sup>+</sup>-oxidizing *Nitrosopumilis*-related Thaumarchaeota have been commonly detected in  
420 ascidian microbiomes [16, 21, 22, 34], which contrasts phylogenetically, but not in terms of overall  
421 function with the NH<sub>4</sub><sup>+</sup>-oxidizing *Nitrosomonas*-ASV that was part of the SaM core. The niche  
422 however has been reported to be different for the archaeal and bacterial ammonia oxidizers in  
423 which the archaea tend to be found in oligotrophic systems, while the bacteria (e.g., *Nitrosomonas*)  
424 can tolerate high levels of dissolved ammonia [reviewed by 35]. This result might reflect both the  
425 environment, and in situ *S. adareanum* tissue ammonia levels where it may accumulate, as several  
426 studies have reported on the high levels of oxidizing ammonia Thaumarchaeota in the coastal  
427 waters of the Anvers Island archipelago. This group, however, is numerous only in winter to early  
428 spring waters [36-38], while this study was conducted with samples collected in Fall when the  
429 ammonia-oxidizing Thaumarchaeota are not abundant in the coastal seawater [36], advocating for  
430 the comparisons between the SaM with bacterioplankton collected in both summer and winter  
431 periods.

432 In a similar vein, although we did not intentionally conduct a temporal study, the data from  
433 samples collected in 2007 and 2011, appear to suggest that a number of the core microorganisms are  
434 stable over time. We found several ASVs in 2011 samples that matched (at 100% sequence identity)  
435 cloned sequences from samples collected in 2007. Stability of the ascidian microbiome over time has  
436 been reported in a few studies [17, 24, 34]. Studying the persistence of the core membership over the  
437 annual cycle would be interesting (and provide compelling evidence for stable relationships) in this  
438 high latitude environment where light, carbon production, and sea ice cover are highly variable.

439 The co-occurrence analysis indicated three subsystems of ASVs that co-occur within *S.*  
440 *adareanum*. A small side-network included the two taxa involved with the 2-step nitrification  
441 process, including the *Nitrosomonas* ASV mentioned above and a *Nitrospira* ASV. Even though at  
442 present, the functional underpinnings of the host-microbial system have not been studied, the co-  
443 occurrence relationships provide fodder for hypothesis testing in the future. One interaction  
444 network that warrants mentioning here is the ASVs in Subsystem 1, which harbor several Core80  
445 *Microbulbifer* ASVs, and the *Pseudovibrio* ASV are linked to a *Bdellovibrio* ASV that is also a member  
446 of the Core80. Members of the *Bdellovibrio* genus are obligate bacterial predators [32] that  
447 penetrate the outer membrane and cell wall of their prey. The linkage position in the subsystem is  
448 compelling in the sense that the *Bdellovibrio* could potentially control the abundance of the  
449 “downstream” less connected members of the network. Lastly, the positions of a couple of Dynamic  
450 and several the Variable ASVs in the network, as links between the subsystems, was unexpected.  
451 The central positions of these ASVs suggest that they may not be merely stochastic members of the  
452 microbiome; that they could play opportunistic, adaptive or ecological roles in the functionality of  
453 the microbiome subsystem(s) which potentially participate in different aspects of the holobiont  
454 system in particular, by promoting the switch between different ecological modes supported by  
455 different subsystems. Such roles were proposed for dynamic members of the *Styela plicata*  
456 microbiome [21].

457 The culturing effort succeeded in isolating a *Pseudovibrio* strain that is a crucial member of the  
458 Core80. In addition, several other Gammaproteobacteria-affiliated strains which matched sequences  
459 in the Variable SaM and the bacterioplankton were cultivated, however the cultivated diversity  
460 using the approaches applied here reared a collection of limited diversity. It is likely that additional  
461 media types and isolation strategies could result in additional cultivated diversity as there are a  
462 number of taxa with aerobic heterotrophic lifestyles in the Core80 that have been brought into pure  
463 culture (e.g., *Microbulbifer*, *Hoeflea*). One challenge we experienced using the nutrient replete media  
464 was overgrowth of plates, even at 10 °C.

### 465 3.2 Secondary metabolite distributions and bioaccumulation in marine biota.

466 Although the results of the archipelago spatial ascidian survey did not support a direct  
467 relationship between PalA levels and the relative abundance of microbiome ASVs, the results of the  
468 PalA niche analysis suggests that the Core80 ASVs occur in a preferred optimum and tolerance



469 range of PalA levels. The lack of specific ASV-PalA patterns may not be entirely surprising, as  
470 secondary metabolites result from a complex combination of metabolic reactions that require a fine-  
471 tuning to environmental conditions and further metabolic modeling for the sake of understanding.  
472 Furthermore, these metabolites have been found to accumulate in the tissues in several different  
473 marine invertebrates. The Optimal Defense Theory can be applied to marine invertebrates and  
474 reflects the hypothesis that secondary metabolites are distributed in specific tissues based on  
475 exposure and anatomic susceptibility for predation [40]. For example, nudibranchs sequester toxic  
476 compounds, which have been biosynthesized by the gastropod or acquired from their prey. The  
477 toxins are concentrated in the anatomical space of their mantles, the most vulnerable portion of  
478 their soft, exposed bodies [40-42]. Bioaccumulation of secondary metabolites in invertebrates with  
479 less anatomical differentiation is also known to occur. In the phylum Porifera, different cell types  
480 and layers have been studied to determine spatial and anatomical differences in secondary  
481 metabolite concentrations [43-45]. Compounds have been found to be concentrated spatially on the  
482 surface (e.g., [46]) or apical parts of the sponge [47] in some cases. Sponges may be able to  
483 differentially bioaccumulate secondary cytotoxic metabolites based on tissues more susceptible to  
484 predation [48]. Metabolite distribution investigations that are ascidian-specific are less well  
485 documented; however, there is also evidence of ascidian secondary cytotoxic metabolite  
486 bioaccumulation. The patellazoles, marine macrolides from the ascidian *Lissoclinum patella*,  
487 bioaccumulate in the ascidian tissues to concentrations up to seven orders of magnitude higher than  
488 their cytotoxic dose in mammalian cell lines [49, 50]. Additionally, there are other instances in  
489 which bioaccumulation in ascidian host tissues suggests metabolic cooperation of producer and  
490 host as well as compound translocation from producer to host [15, 51, 52]. Although the PalA levels  
491 were normalized to grams of dry lobe weight, tissue-specific spatial localization is a potentially  
492 confounding factor in the statistical analyses investigating the ASV:PalA relationship.

### 493 3.3 Biosynthetic potential of the core.

494 We investigated the natural product biosynthetic potential of the nine genera associated with  
495 15 of 21 Core80 ASVs using antiSMASH (Table 2, Table S3). From this, it appears that all genera had  
496 at least one relative at the genus level with biosynthetic capacity for either polyketide or  
497 nonribosomal peptide biosynthesis or both. Even though the number of genomes available to  
498 survey were highly uneven, there is quite a disparity of biosynthetic capacity between the genera  
499 analyzed, thus, it appears that *Pseudovibrio*, *Nitrosomonas*, *Microbulbifer*, *Nitrospira* have the greatest  
500 capacities (in that order). Likewise, *Microbulbifer*, *Pseudovibrio*, *Hoeflea* and *Opiritaceae* might be  
501 prioritized as candidate PalA producers based solely on relative abundance ranking (Table 2; [24]).  
502 Although we did not conduct this analysis for the six ASVs that were classified at best at the family  
503 or order level, a few of these might be worth considering as potential producers considering their  
504 higher-level relationships with marine natural product producing lineages. For example, marine  
505 actinobacteria are classically associated with the production of numerous bioactive natural products  
506 (e.g., [53, 54]), although speculation is difficult with actinobacteria SaM\_ASV20 in the core as it is  
507 only distantly related to known natural product producers. Likewise, *Opiritaceae*-related  
508 SaM\_ASV15 is ranked 7 in terms of average relative abundance and falls in the same family the  
509 ascidian-associated *Candidatus Didemnitutus mandela*, which harbors the biosynthetic gene cluster  
510 predicted to produce mandelalide, a glycosylated polyketide [55]. From this we might prioritize the  
511 *Microbulbifer*, *Pseudovibrio*, and *Opiritaceae* ASVs for downstream investigation, with the lower  
512 relative abundance *Nitrosomonas* and *Nitrospira* ASVs also holding some potential given the perhaps  
513 surprising abundance of biosynthetic gene cluster content in these chemoautotrophic, and generally  
514 small genome size taxa. Although this analysis focused on predicted pathway characterizations  
515 across genera detected, the distributions of predicted pathways varied substantially across the taxa  
516 analyzed. The potential for these new Antarctic ascidian-associated strains to harbor secondary  
517 metabolite pathways remains speculative as they are amongst the most variable component of a  
518 bacterium's genome.

519

520  
521  
522  
523  
524  
525  
526  
527

**Table 2.** Taxonomic affiliations of core microbiome, relative abundance rank, and potential of affiliated genus in natural product gene cluster biosynthesis. Taxonomy is shown according to genome taxonomy database (GTDB) classification and NCBI taxonomy is included (GTDB/NCBI) where they differ. Biosynthetic potential only calculated for ASVs with Genus-level taxonomic assignments was based on representative genome biosynthetic gene cluster content in the same genus (See Figure S3 for list of genomes). ASVs in bold ranked in the top 10. Where more than one ASV was found per genus, the average relative abundance and standard deviations were summed. n=63 individuals.

| ASV_ID                               | Phylum, highest taxonomic assignment                       | Average Relative abundance (%) | Rank                        | Nearest neighbor % identity | NRP BGC  | PKS BGC  | Combined NRP-PKS |
|--------------------------------------|------------------------------------------------------------|--------------------------------|-----------------------------|-----------------------------|----------|----------|------------------|
| <b>SaM_ASV1, 2, 4, 5, 10, 17, 18</b> | <b>Proteobacteria, Microbulbifer</b>                       | <b>77.54 ± 21.86</b>           | <b>1, 2, 4, 5, 8, 9, 10</b> | <b>97.42</b>                | <b>+</b> | <b>+</b> |                  |
| SaM_ASV7                             | Proteobacteria, Endozoicomonas                             | 0.47 ± 0.51                    | 13                          | 96.71                       | +        | +        |                  |
| SaM_ASV13                            | Proteobacteria, Nitrosomonas                               | 0.46 ± 0.35                    | 14                          | 99.77                       | +        | +        | +                |
| <b>SaM_ASV3</b>                      | <b>Proteobacteria, Pseudovibrio</b>                        | <b>19.92 ± 4.74</b>            | <b>3</b>                    | <b>98.75</b>                | <b>+</b> | <b>+</b> | <b>+</b>         |
| <b>SaM_ASV6</b>                      | <b>Proteobacteria, Hoeflea</b>                             | <b>1.59 ± 1.36</b>             | <b>6</b>                    | <b>99.25</b>                | <b>+</b> | <b>+</b> | <b>+</b>         |
| SaM_ASV16                            | Proteobacteria, Halocynthiibacter                          | 0.63 ± 0.64                    | 11                          | 99.75                       | +        |          |                  |
| SaM_ASV11                            | Nitrospirota/<br>Nitrospirae, Nitrospira                   | 0.27 ± 0.23                    | 15                          | 98.32                       | +        | +        | +                |
| SaM_ASV12                            | Bacteroidota/<br>Bacteroidetes, Lutibacter                 | 0.50 ± 0.55                    | 12                          | 94.54                       | +        |          | +                |
| SaM_ASV14                            | Verrucomicrobiota/<br>Verrucomicrobia, Lentimonas          | 0.16 ± 0.22                    | 19                          | 99.77                       | +        |          | +                |
| Sam_ASV21                            | Proteobacteria, Rhodobacteraceae                           | 0.18 ± 0.26                    | 18                          | 98.75                       |          |          |                  |
| SaM_ASV8                             | Proteobacteria, Rhodospirillales                           | 0.22 ± 0.22                    | 17                          | 86.60                       |          |          |                  |
| SaM_ASV9                             | Bdellovibrionota/<br>Proteobacteria, Bdellovibrionaceae    | 0.15 ± 0.09                    | 20                          | 90.35                       |          |          |                  |
| SaM_ASV19                            | Bacteroidetes, Cryomorphaceae                              | 0.24 ± 0.23                    | 16                          | 89.10                       |          |          |                  |
| <b>SaM_ASV15</b>                     | <b>Verrucomicrobiota/<br/>Verrucomicrobia, Opatutaceae</b> | <b>1.34 ± 2.77</b>             | <b>7</b>                    | <b>90.14</b>                |          |          |                  |
| SaM_ASV20                            | Actinobacteria, Solirubrobacterales                        | 0.05 ± 0.05                    | 21                          | 91.80                       |          |          |                  |

528

529

#### 4. Materials and Methods

530

##### 4.1 Cultivation-dependent effort.

531

532

533

534

535

536

*S. adareanum* samples collected by SCUBA in 2004 and 2007 were used for cultivation (**Table S4**). The 2004 specimen were archived in 20% glycerol at -80 °C until processing by manual homogenization using sterilized mortar and pestle prior to plating a suspension onto marine agar 2216 plates in 2006. The 2007 samples were homogenized immediately following collection using sterilized mortar and pestle, and suspensions were prepared in 1X marine broth or filter-sterilized seawater then transferred at 4 °C to DRI. Shortly after (within 1 month of collection), the 2007

537 isolates were cultivated on three types of media in which suspensions initially stored in marine  
538 broth were plated onto marine agar (2216), while homogenate preparations stored in seawater were  
539 plated onto VNSS agar media [56] and amended seawater plates (3 grams yeast extract (Difco), 5 g  
540 peptone (Difco), and 0.2 grams casein hydrolysate (Difco) per liter). Colonies were selected from  
541 initial plates, and purified through three rounds of growth on the same media they were isolated  
542 on.

#### 543 4.2 Field sample collections for cultivation-independent efforts.

544 Next, a spatial survey of *Synoicum adareanum* was executed in which samples were collected by  
545 SCUBA in austral fall between 23 March and 3 April 2011. Seven sampling sites (depths 24.7 - 31 m;  
546 Table S5) around the region accessible by Zodiac boat from Palmer Station were selected in which  
547 we sampled in a nested design where three multi-lobed colonies were selected from each site, and  
548 three lobes per colony were sampled (Figure 1). Underwater video [57] was taken at each site, then  
549 video footage was observed to note general ecosystem characteristics (% cover of major benthic  
550 species and algae). In total, 63 *S. adareanum* lobes were sampled (9 from each site). Samples were  
551 transported to Palmer Station on ice, and frozen at -80 °C until processing at DRI and USF. Frozen  
552 *S. adareanum* lobes were cut longitudinally in half for parallel processing through DNA and  
553 palmerolide detection pipelines.

554 Then, to address whether the composition of the SaM was distinct from the free-living  
555 bacterioplankton (< 2.5-µm fraction), we considered the overlap in membership between the SaM  
556 and bacterioplankton in the water column. To accomplish this, we used a reference seawater data  
557 set represented by samples that had been collected in February-March 2008 (five samples) and in  
558 August-September 2008 (nine samples) from LTER Station B near Anvers Island (east of the  
559 Bonaparte Point dive site), and at a few other locations in the region (Table S6). Seawater samples  
560 were collected by a submersible pump and acid washed silicone tubing at 10 m at Station B, and  
561 using a rosette equipped with 12 L Niskin bottles for the offshore samples at 10 m and 500 m (2  
562 samples each depth). The February-March seawater samples were processed using in-line filtration  
563 with a 2.5 µm filter (Polygard, Millipore) to screen larger organisms and bacterioplankton were  
564 concentrated using a tangential flow filtration system and the cells were harvested on 25 mm 0.2  
565 µm Supor filters (Millipore). The August-September seawater samples were processed using inline  
566 filtration with a 3.0 µm filter (Versapor, Millipore), and then bacterioplankton was collected onto 0.2  
567 µm Sterivex (Millipore) filters using a multichannel peristaltic pump (Masterflex). All filters were  
568 immersed in sucrose:Tris:EDTA buffer [58] and stored frozen at -80 °C until extraction.

#### 569 4.3 Palmerolide A screening.

570 Sixty-three frozen *Synoicum adareanum* lobes were cut in half. Half lobes were lyophilized and  
571 then exhaustively extracted using dichloromethane for three days, followed by methanol for three  
572 days. The extracts were combined and dried on a rotary evaporator. The extracts were filtered,  
573 dried down, and reconstituted at 1.0 mg/mL to ensure the injected concentration was consistent.  
574 The residue was subjected to Liquid Chromatography-Mass Spectrometry (LC-MS) analysis using a  
575 H<sub>2</sub>O:ACN gradient with constant 0.05% formic acid. The high-resolution mass spectra were  
576 recorded on an Agilent Technologies 6230 electrospray ionization Time-of-Flight (ESI-ToF)  
577 spectrometer. LC-MS was performed using a C-18 Kinetex analytical column (50 × 2.1 mm;  
578 Phenomenex). The presence of PalA was verified using MS/MS on an Agilent Technologies 6540  
579 UHD Accurate-Mass QTOF LC-MS.

580 The *S. adareanum*-associated microbial culture collection was screened for the presence of PalA.  
581 Isolates were cultivated in 30 mL volumes, and the resulting biomass was lyophilized and screened  
582 by HPLC. Each sample was analyzed in ESI-SIM mode targeting masses of 585 amu and 607 amu.  
583 The reversed-phase chromatographic analysis consisted of a 0.7 mL/min solvent gradient from 80%  
584 H<sub>2</sub>O:CH<sub>3</sub>CN to 100% CH<sub>3</sub>CN with constant 0.05% formic acid using the same C-18 column as  
585 above. The analysis was conducted for over 18 min. PalA had a retention time of approximately 14  
586 min. The twenty-four sample sequence was followed by a PalA standard to confirm its analytical  
587 characteristics.

588 4.4 *S. adareanum*-associated microbial cell preparation.

589 The outer 1-2 mm of the ascidian tissue, which could contain surface-associated  
590 microorganisms, was removed using a sterilized scalpel before sectioning tissue subsamples (~0.2 g)  
591 of frozen (-80 °C) *S. adareanum* (½ lobe sections). Tissue samples were diced with a scalpel before  
592 homogenization in sterile autoclaved and filtered seawater (1 mL) in 2 mL tubes. Each sample was  
593 homogenized (MiniLys, Bertin Instruments) using sterile CK28 beads (Precellys, Bertin  
594 Instruments) 3X at 5000 rpm for 20 sec, samples were placed on ice in between each  
595 homogenization. Homogenates were centrifuged at 500 × g at 4 °C for 5 min to pellet tissue debris.  
596 The supernatant was removed to a new tube for a second spin at the same conditions. This  
597 supernatant was decanted and the cell suspension centrifuged at 12,000 × g at 4 °C for 5 min to  
598 collect the microbial cells. Suspensions were stored on ice, then entered an extraction pipeline in  
599 which 12 samples were processed in parallel on the QIAvac 24 Plus Manifold (Qiagen).

600 4.5 DNA extractions.

601 *S. adareanum*-associated microbial cell preparations were extracted with Powerlyzer DNEasy  
602 extraction (Qiagen) following manufacturer's instructions starting at with the addition of the lysis  
603 solution. Samples were processed in parallel in batches of twelve at a time using the QiaVac 24 Plus  
604 Vacuum Manifold (Qiagen). The lysis step (2X at 5000 rpm for 60 seconds each with incubation on  
605 ice was performed on the MiniLys (Precellys, Bertin Instruments) using the 0.1 mm glass beads that  
606 come with the Powerlyzer kit. DNA concentrations of final preparations were estimated using  
607 Quant-iT Picogreen dsDNA Assay Kit (Invitrogen) fluorescence detection on a Spectramax Gemini  
608 (Molecular Devices).

609 DNA from bacterioplankton samples was extracted following [58], and DNA from bacterial  
610 cultures was extracted using the DNEasy Blood and Tissue kit (Qiagen) following manufacturer's  
611 instructions. All DNA concentrations were estimated using Picogreen.

612 4.6 16S rRNA gene sequencing.

613 Illumina tag sequencing for the *S. adareanum* microbiome (SaM) targeted the V3-V4 region of  
614 the 16S rRNA gene using primers 341F CCTACGGGNBGCASCAG and 806R  
615 GGACTACHVGGGTWTCTAAT. The first round of PCR amplified the V3-V4 region using HIFI  
616 HotStart Ready Mix (Kapa Biosystems). The first round of PCR used a denaturation temperature of  
617 95 °C for 3 min, 20 cycles of 95 °C for 30 sec, 55 °C for 30 sec and 72 °C for 30 sec and followed by an  
618 extension of 72 °C for 5 minutes before holding at 4 °C. The second round of PCR added Illumina-  
619 specific sequencing adapter sequences and unique indexes, permitting multiplexing, using the  
620 Nextera XT Index Kit v2 (Illumina) and HIFI HotStart Ready Mix (Kapa Biosystems). The second  
621 round of PCR used a denaturation temperature of 95 °C for 3 minutes, 8 cycles of 95 °C for 30  
622 seconds, 55 °C for 30 seconds and 72 °C for 30 seconds and followed by an extension of 72 °C for 5  
623 minutes before holding at 4 °C. Amplicons were cleaned up using AMPure XP beads (Beckman  
624 Coulter). A no-template control was processed but did not show a band in the V3-V4 amplicon  
625 region and was sequenced for confirmation. A Qubit dsDNA HS Assay (ThermoFisher Scientific)  
626 was used for DNA concentration estimates. The average size of the library was determined by the  
627 High Sensitivity DNA Kit (Agilent) and the Library Quantification Kit – Illumina/Universal Kit  
628 (KAPA Biosystems) quantified the prepared libraries. The amplicon pool sequenced on Illumina  
629 MiSeq generated paired end 301 bp reads was demultiplexed using Illumina's bcl2fastq.

630 The bacterioplankton samples sent to the Joint Genome Institute (JGI) for library preparation  
631 and paired end (2 × 250 bp) MiSeq Illumina sequencing of the variable region 4 (V4) using primers  
632 515F (5'-GTGCCAGCMGCCGCGGTAA-3') and 806R (5'-GGACTACHVGGGTWTCTAAT-3') [59].  
633 Sequence processing included removal of PhiX contaminants and Illumina adapters at JGI.

634 The identity of the cultivated isolates was confirmed by 16S rRNA gene sequencing using  
635 Bact27F and Bact1492R primers either by directly sequencing agarose-gel purified PCR products  
636 (Qiagen), or TA cloning (Invitrogen) of PCR fragments into *E. coli* following manufacturer's  
637 instructions in which three clones were sequenced for each library, plasmids were purified (Qiagen)



638 at the Nevada Genomics Center, where Sanger sequencing was conducted on an ABI3700 (Applied  
639 Biosystems). Sequences were trimmed and quality checked using Sequencer, v. 5.1.

#### 640 4.7 16S rRNA gene sequencing.

641 We employed a QIIME2 pipeline [60] using the DADA2 plug-in [61] to de-noise the data and  
642 generate amplicon sequence variant (ASV) occurrence matrices for the SaM and bacterioplankton  
643 samples. The rigor of ASV determination was used in this instance given the increased ability to  
644 uncover variability in the limited geographic study area, interest in uncovering patterns of host-  
645 specificity, and ultimately in identifying the conserved, core members of the microbiome, at least  
646 one of which may be capable of PalA biosynthesis. Sequence data sets were initially imported into  
647 QIIME2 working format and the quality of forward and reverse were checked. Default trimming  
648 parameters included trimming all bases after the first quality score of 2, in addition, the first 10  
649 bases were trimmed, and reads shorter than 250 bases were discarded. Next the DADA2 algorithm  
650 was used to de-noise the reads (corrects substitution and insertion/deletion errors and infers  
651 sequence variants). After de-noising, reads were merged. The ASVs were constructed by grouping  
652 the unique full de-noised sequences (the equivalent of 100% OTUs, operational taxonomic units).  
653 The ASVs were further curated in the QIIME2-DADA2 pipeline by removing chimeras in each  
654 sample individually if they can be exactly reconstructed by combining a left-segment and a right-  
655 segment from two more abundant “parent” sequences. A pre-trained SILVA 132 99% 16S rRNA  
656 Naive Bayes classifier (<https://data.qiime2.org/2019.1/common/silva-132-99-nb-classifier.qza>) was  
657 used to perform the taxonomic classification. Compositions of the SaM and the bacterioplankton  
658 ASVs were summarized by proportion at different taxonomy levels, including genus, family, order,  
659 class, and phylum ranks. In order to retain all samples for diversity analysis, we set lowest reads  
660 frequency per sample (n = 62 samples at 19003 reads; n = 63 samples at 9987 reads) as rarefaction  
661 depth to normalize the data for differences in sequence count. ASVs assigned to Eukarya or with  
662 unassigned taxa (suspected contaminants) were removed from the final occurrence matrix such that  
663 the final matrix read counts were slightly uneven with the lowest number of reads per sample with  
664 9961 reads.

665 The SaM ASVs were binned into Core (highly persistent) if present in  $\geq 80\%$  of samples  
666 (Core80), Dynamic if present in 50-79% of samples (Dynamic50) and those that comprise the  
667 naturally fluctuating microbiome, or Variable fraction that was defined as those ASVs present in  
668  $< 50\%$  of the samples [2, 3]. We used these conservative groupings of the core microbiome due to the  
669 low depth of sequencing in our study [3].

670 ASV identities between the SaM, the *S. adareanum* bacterial isolates and the bacterioplankton  
671 data sets were compared using CD-HIT (cd-hit-est-2d; <http://cd-hit.org>). The larger SaM data set  
672 which included 19,003 sequences per sample was used for these comparisons to maximize the  
673 ability to identify matches; note that this set does exclude one sample, Bon1b which had half as  
674 many ASVs, though overall this larger data set includes nearly 200 additional sequences in the  
675 Variable fraction for comparison. ASVs with 100 and 97% identity between the pairwise  
676 comparisons were summarized in terms of their membership in the Core, Dynamic or Variable  
677 fractions of the SaM. Likewise, CD-HIT was used to dereplicate the isolate sequences at a level of  
678 99% sequence identity, and then the dereplicated set was compared against the bacterioplankton  
679 iTag data set.

680 Phylogenetic analysis of the SaM ASVs, *S. adareanum* bacterial isolates, and 16S rRNA gene  
681 cloned sequences from Riesenfeld et al. [13] was conducted with respect to neighboring sequences  
682 identified in the Ribosomal Database Project and SILVA and an archaea outgroup using MEGA v.7  
683 [62]. Two maximum likelihood trees were constructed; the first with the Core80 ASVs, and the  
684 second with both Core80 and Dynamic50 ASVs. A total of 369 aligned positions were used in both  
685 trees. A total of 1000 bootstrap replicates were run in both instances, in which the percentage ( $\geq 50$   
686 %) of trees in which the associated taxa clustered together are shown next to the branches.

687

688

#### 689 4.8 Statistical analyses.

690 T-tests were run in Statistica (v. 13) to determine significance ( $p < 0.05$ ) of site-to-site, within  
691 and between colony variation in PalA concentrations. Similarity-matrix and hierarchical clustering  
692 analyses were performed using PRIMER v.7 and PERMANOVA+ (PRIMER-e). Analyses were  
693 performed on the complete microbiome as well as the three microbiome fractions in most cases. The  
694 ASV occurrence data was square root transformed for all analyses. A heat map based on the Core80  
695 ASV occurrence was generated with the transformed data, and hierarchical clustering with group  
696 average parameter was employed, which was integrated with SIMPROF confidence using 9,999  
697 permutations and a 5% significance level. Bray-Curtis resemblance matrixes were created using  
698 ASV occurrences without the use of a dummy variable. To determine basic patterns in community  
699 structure within vs. between colony and site differences the significance was determined by t-test  
700 using Statistica v. 13. To compare within colony ( $n = 9$ ) vs. between colony differences ( $n = 27$ ), nine  
701 “between colony pairwise similarity values were randomly sampled in order to compare equal  
702 sample sizes, checking that the homogeneity of variance was similar between them. Then threshold  
703 metric Multi-Dimensional Scaling (tmMDS) was conducted based on Kruskal fit scheme 1,  
704 including 500 iterations, and a minimum stress of 0.001. Similarity profile testing through SIMPROF  
705 were performed based on a null hypothesis that no groups would demonstrate differences in ASV  
706 occurrences. This clustering algorithm was also used to generate confidence levels on the MDS plot,  
707 which were set to 65% and 75%. In addition, 95% bootstrap regions were calculated with 43  
708 bootstraps per group, set to ensure a minimum rho of 0.99. In order to assess the contribution of  
709 each factor to the variance of the microbial community in this nested experimental design,  
710 Site(Colony), permutational multivariate analysis of variance (PERMANOVA) was used. Site-based  
711 centroids were calculated and the PERMDISP algorithm was used to determine the degree of  
712 dispersion around the centroid for each site. Overall site-to-site difference in dispersion was  
713 determined and pairwise comparisons were also calculated with 9,999 permutations used to  
714 determine significance ( $P(\text{perm}) < 0.05$ ). Exploratory analysis of the major ASV contributors to  
715 similarity was performed using the SIMPER procedure based on sites and colonies, with a cut off  
716 for low contributions set to 70%.

717 Co-occurrence networks were constructed using filtered ASV occurrence data sets in which the  
718 ASV were filtered to only those that were present in at least five samples resulting in a 102 ASV  
719 data set. The 102 x 63 matrix was provided as input to FlashWeave v1.0 [63] using default  
720 parameters, and visualized in Gephi v. 0.9.2 [64]. Then to consider whether the ASVs in the Core80,  
721 Dynamic50, or Variable fractions of the SaM were affiliated with particular levels of PalA in the  
722 ascidian lobes, PalA niche robust optimum and range were computed using the occurrence and dry  
723 weight normalized contextual data [65]. Weighted gene correlation network analysis (WGCNA  
724 package in R [66]) was used to identify modules and their correlation with PalA levels. The matrix  
725 was total-sum normalized [67], and WGCNA was used in signed mode. There were few modules  
726 detected, although they were not correlated with PalA. Modules were projected on the FlashWeave  
727 co-occurrence network and called subsystems.

#### 728 4.9 Biosynthetic gene cluster analysis.

729 Subsequently, in order to predict the likelihood of Core80 ASV lineages harboring the potential  
730 for natural product biosynthesis we designed a meta-analysis of neighboring genomes found at the  
731 Integrated Microbial Genomes (IMG) database [68]. The analysis was conducted only for ASVs in  
732 which confidence of taxonomic assignment was at the genus level. Therefore, genomes were  
733 harvested from IMG that were associated with a total of 9 genera (*Microbulbifer* (16 genomes),  
734 *Pseudovibrio* (24 genomes), *Endozoicomonas* (11 genomes), *Nitrosomonas* (19 of 68 total genomes in  
735 this genus), *Nitrospira* (14 genomes), *Hoeflea* (7 genomes), *Lutibacter* (12 genomes), *Halocynthilibacter*  
736 (2 genomes), and in the case of *Lentimonas*, since no genomes were found, we harvested 8 genomes  
737 from the Punicococcaceae family). This results in 113 genomes that were submitted to antiSMASH  
738 [69] for analysis. The genomes and counts of biosynthetic gene clusters assigned to nonribosomal  
739 peptide synthase, polyketide synthase, or hybrid of the two classes were tabulated (Table S2).

#### 740 4.10 Data availability.

741 *Synoicum adareanum* microbiome Illumina sequence information and associated metadata are  
742 described under NCBI BioProject PRJNA597083 ([https://www.ncbi.nlm.nih.gov/bioproject/?](https://www.ncbi.nlm.nih.gov/bioproject/?term=PRJNA597083)  
743 [term=PRJNA597083](https://www.ncbi.nlm.nih.gov/bioproject/?term=PRJNA597083)), and the *S. adareanum* culture collection 16S rRNA gene sequences were  
744 deposited in GenBank under MN960541- MN960556. The bacterioplankton sequence information  
745 and associated metadata are described under NCBI BioProject PRJNA602715  
746 (<https://www.ncbi.nlm.nih.gov/bioproject/?term=PRJNA602715>). Records for these Antarctic  
747 metadata and associated sequences depositions are also reflected in the mARS database  
748 (<http://mars.biodiversity.aq>).

#### 749 5. Conclusions

750 This work has advanced our understanding of the Antarctic ascidian *S. adareanum*, PalA  
751 distributions, and microbiome in several ways. First, we found PalA to be a dominant product  
752 across all 63 samples, with some variation but no coherent trends with the site, sample, or  
753 microbiome ASV. The results point to a conserved, core, microbiome represented by 21 ASVs, 20 of  
754 which appear to be distinct from the bacterioplankton. The phylogenetic distribution of these taxa  
755 was diverse, and distinct from other ascidian microbiomes in which organisms with both  
756 heterotrophic and chemosynthetic lifestyles are predicted. The co-occurrence analysis suggested the  
757 potential for ecologically interacting microbial networks that may improve our understanding of  
758 this ascidian-microbiome-natural product system. Likewise, based on the occurrence of natural  
759 product biosynthetic gene clusters, there are several potential PalA producers. These results  
760 advance the long-term goal of *Synoicum adareanum*-palmerolide-microbiome research which is  
761 compelled by the fact that by identifying the producer, genome sequencing could then provide  
762 information on PalA biosynthesis which could lead to the development of a potential therapeutic  
763 agent to fight melanoma.

764 **Supplementary Materials:** The following are available online at [www.mdpi.com/xxx/s1](http://www.mdpi.com/xxx/s1), Table S1:  
765 PERMANOVA estimators of drivers of variability, Table S2: Taxonomic distribution of bacterioplankton ASVs,  
766 Table S3 Biosynthetic gene clusters in bacterial genomes related to Core80 SaM genera, Table S4: *Synoicum*  
767 *adareanum* collections and preparations for microbiome cultivation, Table S5 *Synoicum adareanum* collections for  
768 palmerolide A and microbiome characterization by V3-4 rRNA gene tag sequencing, Table S6: Bacterioplankton  
769 collections used in v4 rRNA gene tag sequencing. Figure S1: Maximum likelihood 16S rRNA gene phylogenetic  
770 tree, Figure S2: Results of pairwise t-tests of PalA levels determined by mass spectrometry, Figure S3: Average  
771 pairwise similarity within and between *S. adareanum* microbiome community structures, Figure S4: tmMDS plots  
772 representing the microbiome of the 63 *S. adareanum* samples, Figure S5. PalA niche optimum for *S. adareanum*  
773 microbiome ASVs.

774 **Author Contributions:** This work was the result of a team effort in which the following contributions are  
775 recognized: conceptualization, A.E.M., P.S.G.C, and B.J.B. methodology and experimentation, A.E.M., N.E.A.,  
776 L.B., D. E., M.L.H., S.K., C.S.R. and R.M.Y.; validation, K.D., M.L.H., and B.J.B. formal analysis, A.E.M., N.E.A.,  
777 E.D., D.E., S.K., and C-C.L.; data curation, M.L.H. and C-C.L.; writing—original draft preparation, A.E.M., B.J.B.,  
778 N.E.A., D.E., S.K., and C-C.L.; writing—review and editing, A.E.M., N.E.A, B.J.B., L.B., P.S.G.C., A.E.K.D., D.E.,  
779 S.K., C.S.R., and R.M.Y.; supervision, A.E.M., B.J.B., P.S.G.C., K.W.D., A.E.K.D., and C.S.R.; project  
780 administration, K.W.D.; funding acquisition, A.E.M., P.S.G.C., and B.J.B. All authors have read and agreed to  
781 the published version of the manuscript.

782 **Funding:** Support for this research was provided in part by the National Institute of Health award (CA205932)  
783 with additional support from National Science Foundation awards (OPP-0442857, ANT-0838776, PLR-1341339  
784 to B.J.B. and ANT-0632389 to A.E.M. and Postdoctoral Research Fellowship award DBI-0532893 to C.S.R.).  
785 Support for the sequencing of the bacterioplankton was provided as part of the Joint Genome Institute's  
786 Community Sequencing Program (JGI-634 to A.E.M.).

787 **Acknowledgments:** The assistance of several collaborators and students is also acknowledged including Charles  
788 Amsler, Margaret Amsler, Jason Cuce, Bill Dent, Alex Dussaq, Cheryl Gleasner, Alan Maschek, Robert W. Read,  
789 Andrew Shilling, Santana Thomas, and the Palmer Station science support staff.

790 **Conflicts of Interest:** The authors declare no conflict of interest.

## 791 References

- 792 1. Taylor, M. W.; Tsai, P.; Simister, R. L.; Deines, P.; Botte, E.; Ericson, G.; Schmitt, S.; Webster, N. S., 'Sponge-  
793 specific' bacteria are widespread (but rare) in diverse marine environments. *ISME J* **2013**, *7*, 438-443.
- 794 2. Ainsworth, T. D.; Krause, L.; Bridge, T.; Torda, G.; Raina, J. B.; Zakrzewski, M.; Gates, R. D.; Padilla-  
795 Gamino, J. L.; Spalding, H. L.; Smith, C.; Woolsey, E. S.; Bourne, D. G.; Bongaerts, P.; Hoegh-Guldberg, O.;  
796 Leggat, W., The coral core microbiome identifies rare bacterial taxa as ubiquitous endosymbionts. *ISME J*  
797 **2015**, *9*, 2261-2274.
- 798 3. Hernandez-Agreda, A.; Leggat, W.; Bongaerts, P.; Ainsworth, T. D., The microbial signature provides  
799 insight into the mechanistic basis of coral success across reef habitats. *mBio* **2016**, *7*, e00560-16.
- 800 4. Burgsdorf, I.; Erwin, P. M.; Lopez-Legentil, S.; Cerrano, C.; Haber, M.; Frenk, S.; Steindler, L., Biogeography  
801 rather than association with cyanobacteria structures symbiotic microbial communities in the marine  
802 sponge *Petrosia ficiformis*. *Front. Microbiol.* **2014**, *5*, 529.
- 803 5. Kelly, L. W.; Williams, G. J.; Barott, K. L.; Carlson, C. A.; Dinsdale, E. A.; Edwards, R. A.; Haas, A. F.;  
804 Haynes, M.; Lim, Y. W.; McDole, T.; Nelson, C. E.; Sala, E.; Sandin, S. A.; Smith, J. E.; Vermeij, M. J. A.;  
805 Youle, M.; Rohwer, F., Local genomic adaptation of coral reef-associated microbiomes to gradients of  
806 natural variability and anthropogenic stressors. *Proc. Natl. Acad. Sci. USA* **2014**, *111*, 10227-10232.
- 807 6. Pantos, O.; Bongaerts, P.; Dennis, P. G.; Tyson, G. W.; Hoegh-Guldberg, O., Habitat-specific environmental  
808 conditions primarily control the microbiomes of the coral *Seriatopora hystrix*. *ISME J* **2015**, *9*, 1916-1927.
- 809 7. Lo Guidice, A.; Azzaro, M.; Schiaparelli, S., Microbial symbionts of Antarctic marine benthic invertebrates.  
810 In *The ecological role of microorganisms in the Antarctic environment*, Castro-Sowinski, S., Ed. Springer  
811 Polar Sciences, Springer Nature: Switzerland, 2019; pp 277-296.
- 812 8. Cardenas, C. A.; Gonzalez-Aravena, M.; Font, A.; Hestetun, J. T.; Hajdu, E.; Trefault, N.; Malmbergg, M.;  
813 Bongcarn-Rudloff, E., High similarity in the microbiota of cold-water sponges of the Genus *Mycale* from  
814 two different geographical areas. *PeerJ* **2018**, *6*, 10.7717/peerj.4935.
- 815 9. Webster, N. S.; Negri, A. P.; Munro, M.; Battershill, C. N., Diverse microbial communities inhabit Antarctic  
816 sponges. *Environ. Microbiol.* **2004**, *6*, 288-300.
- 817 10. Steinert, G.; Wemheuer, B.; Janussen, D.; Erpenbeck, D.; Daniel, R.; Simon, M.; Brinkhoff, T.; Schupp, P. J.,  
818 Prokaryotic diversity and community patterns in Antarctic continental shelf sponges. *Front. Mar. Sci.* **2019**,  
819 *6*, 297.
- 820 11. Webster, N. S.; Bourne, D., Bacterial community structure associated with the Antarctic soft coral,  
821 *Alcyonium antarcticum*. *FEMS Microbiol. Ecol.* **2007**, *59*, 81-94.
- 822 12. Murray, A. E.; Rack, F. R.; Zook, R.; Williams, M. J. M.; Higham, M. L.; Broe, M.; Kaufmann, R. S.; Daly, M.,  
823 Microbiome composition and diversity of the ice-dwelling sea anemone, *Edwardsiella andrillae*. *Integr. Comp.*  
824 *Biol.* **2016**, *56*, 542-555.
- 825 13. Riesenfeld, C. S.; Murray, A. E.; Baker, B. J., Characterization of the microbial community and polyketide  
826 biosynthetic potential in the Palmerolide-producing tunicate, *Synoicum adareanum*. *J. Nat. Prod.* **2008**, *71*,  
827 1812-1818.
- 828 14. Palermo, J. A.; Brasco, M. F. R.; Spagnuolo, C.; Seldes, A. M., Illudalane sesquiterpenoids from the soft coral  
829 *Alcyonium paessleri*: The first natural nitrate esters. *J. Org. Chem.* **2000**, *65*, 4482-4486.
- 830 15. Diyabalanage, T.; Amsler, C. D.; McClintock, J. B.; Baker, B. J., Palmerolide A, a cytotoxic macrolide from  
831 the Antarctic tunicate *Synoicum adareanum*. *J. Am. Chem. Soc.* **2006**, *128*, 5630-5631.
- 832 16. Erwin, P. M.; Pineda, M. C.; Webster, N.; Turon, X.; Lopez-Legentil, S., Down under the tunic: bacterial  
833 biodiversity hotspots and widespread ammonia-oxidizing archaea in coral reef ascidians. *ISME J* **2014**, *8*,  
834 (3), 575-588.
- 835 17. Lopez-Legentil, S.; Turon, X.; Espluga, R.; Erwin, P. M., Temporal stability of bacterial symbionts in a  
836 temperate ascidian. *Front. Microbiol.* **2015**, *6*, 1022.
- 837 18. Evans, J. S.; Erwin, P. M.; Shenkar, N.; Lopez-Legentil, S., Introduced ascidians harbor highly diverse and  
838 host-specific symbiotic microbial assemblages. *Sci. Rep.* **2017**, *7*, 11033.
- 839 19. Evans, J. S.; Erwin, P. M.; Shenkar, N.; Lopez-Legentil, S., A comparison of prokaryotic symbiont  
840 communities in nonnative and native ascidians from reef and harbor habitats. *FEMS Microbiol. Ecol.* **2018**,  
841 *94*, fiy139.
- 842 20. Cahill, P. L.; Fidler, A. E.; Hopkins, G. A.; Wood, S. A., Geographically conserved microbiomes of four  
843 temperate water tunicates. *Environ. Microbiol. Rep.* **2016**, *8*, 470-478.



- 844 21. Dror, H.; Novak, L.; Evans, J. S.; Lopez-Legentil, S.; Shenkar, N., Core and dynamic microbial communities  
845 of two invasive ascidians: can host-symbiont dynamics plasticity affect invasion capacity? *Microb. Ecol.*  
846 **2019**, *78*, 170-184.
- 847 22. Erwin, P. M.; Pineda, M. C.; Webster, N.; Turon, X.; Lopez-Legentil, S., Small core communities and high  
848 variability in bacteria associated with the introduced ascidian *Styela plicata*. *Symbiosis* **2013**, *59*, 35-46.
- 849 23. Blasiak, L. C.; Zinder, S. H.; Buckley, D. H.; Hill, R. T., Bacterial diversity associated with the tunic of the  
850 model chordate *Ciona intestinalis*. *ISME J* **2014**, *8*, 309-20.
- 851 24. Tianero, M. D. B.; Kwan, J. C.; Wyche, T. P.; Presson, A. P.; Koch, M.; Barrows, L. R.; Bugni, T. S.; Schmidt,  
852 E. W., Species specificity of symbiosis and secondary metabolism in ascidians. *ISME J* **2015**, *9*, 615-628.
- 853 25. Peng, X.; Adachi, K.; Chen, C. Y.; Kasai, H.; Kanoh, K.; Shizuri, Y.; Misawa, N., Discovery of a marine  
854 bacterium producing 4-hydroxybenzoate and its alkyl esters, parabens. *Appl. Environ. Microbiol.* **2006**, *72*,  
855 5556-5561.
- 856 26. Fukunaga, Y.; Kurahashi, M.; Tanaka, K.; Yanagi, K.; Yokota, A.; Harayama, S., *Pseudovibrio ascidiaceicola*  
857 sp. nov., isolated from ascidians (sea squirts). *Int. J. Syst. Evol. Microbiol.* **2006**, *56*, 343-347.
- 858 27. Schreiber, L.; Kjeldsen, K. U.; Funch, P.; Jensen, J.; Obst, M.; Lopez-Legentil, S.; Schramm, A.,  
859 *Endozoicomonas* are specific, facultative symbionts of sea squirts. *Front. Microbiol.* **2016**, *7*, 1042.
- 860 28. Gonzalez, J. M.; Mayer, F.; Moran, M. A.; Hodson, R. E.; Whitman, W. B., *Microbulbifer hydrolyticus* gen.nov.,  
861 sp. nov., and *Marinobacterium georgiense* gen.nov.sp.nov., two marine bacteria from a lignin-rich pulp mill  
862 waste enrichment community. *Int. J. Syst. Evol. Microbiol.* **1997**, *47*, 369-376.
- 863 29. Schmidt, E. W.; Donia, M. S., Life in cellulose houses: symbiotic bacterial biosynthesis of ascidian drugs  
864 and drug leads. *Curr. Opin. Biotechnol.* **2010**, *21*, 827-833.
- 865 30. Dou, X.; Dong, B., Origins and bioactivities of natural compounds derived from marine ascidians and their  
866 symbionts. *Mar. Drugs* **2019**, *17*, 670.
- 867 31. Little, A. E.; Robinson, C. J.; Peterson, S. B.; Raffa, K. F.; Handelsman, J., Rules of engagement: interspecies  
868 interactions that regulate microbial communities. *Annu. Rev. Microbiol.* **2008**, *62*, 375-401.
- 869 32. Imamura, N.; Nishuma, M.; Takader, T.; Adachi, K.; Sakai, M.; Sano, H., New anticancer antibiotics  
870 pelagiomycins, produced by a new marine bacterium *Pelagiobacter variabilis*. *J. Antibiot.* **1997**, *50*, 8-12.
- 871 33. Quevrain, E.; Domart-Coulon, I.; Pernice, M.; Bourguet-Kondracki, M. L., Novel natural parabens  
872 produced by a *Microbulbifer* bacterium in its calcareous sponge host *Leuconia nivea*. *Environ. Microbiol.* **2009**,  
873 *11*, 1527-1539.
- 874 34. Martínez-García, M.; Stief, P.; Díaz-Valdés, M.; Wanner, G.; Ramos-Esplá, A.; Dubilier, N.; Antón, J.,  
875 Ammonia-oxidizing Crenarchaeota and nitrification inside the tissue of a colonial ascidian. *Environ.*  
876 *Microbiol.* **2008**, *10*, 2991-3001.
- 877 35. Hatzenpichler, R., Diversity, physiology, and niche differentiation of ammonia-oxidizing archaea. *Appl.*  
878 *Environ. Microbiol.* **2012**, *78*, 7501-10.
- 879 36. Murray, A. E.; Preston, C. M.; Massana, R.; Taylor, L. T.; Blakis, A.; Wu, K.; DeLong, E. F., Seasonal and  
880 spatial variability of bacterial and archaeal assemblages in the coastal waters off Anvers Island, Antarctica.  
881 *Appl. Environ. Microbiol.* **1998**, *64*, 2585-2595.
- 882 37. Murray, A. E.; Grzymski, J. J., Diversity and genomics of Antarctic marine micro-organisms. *Phil. Trans.*  
883 *Roy. Soc. B-Bio. Sci.* **2007**, *362*, 2259-2271.
- 884 38. Grzymski, J. J.; Riesenfeld, C. S.; Williams, T. J.; Dussaq, A. M.; Ducklow, H.; Erickson, M.; Cavicchioli, R.;  
885 Murray, A. E., A metagenomic assessment of winter and summer bacterioplankton from Antarctica  
886 Peninsula coastal surface waters. *ISME J* **2012**, *6*, 1901-1915.
- 887 39. Rhoades, D., Evolution of plant chemical defense against herbivores. Herbivores: their interaction with  
888 secondary plant metabolites. Academic Press: New York, 1979.
- 889 40. McPhail, K. L.; Davies-Coleman, M. T.; Starmer, J., Sequestered chemistry of the Arminacean nudibranch  
890 *Leminda millecra* in Algoa Bay, South Africa. *J. Nat. Prod.* **2001**, *64*, 1183-1190.
- 891 41. Carbone, M.; Gavagnin, M.; Haber, M.; Guo, Y. W.; Fontana, A.; Manzo, E.; Genta-Jouve, G.; Tsoukatou,  
892 M.; Rudman, W. B.; Cimino, G.; Ghiselin, M. T.; Mollo, E., Packaging and delivery of chemical weapons: a  
893 defensive trojan horse stratagem in chromodorid nudibranchs. *PLoS One* **2013**, *8*, e62075.
- 894 42. Winters, A. E.; White, A. M.; Dewi, A. S.; Mudianta, I. W.; Wilson, N. G.; Forster, L. C.; Garson, M. J.;  
895 Cheney, K. L., Distribution of defensive metabolites in nudibranch molluscs. *J. Chem. Ecol.* **2018**, *44*, 384-  
896 396.

- 897 43. Schupp, P.; Eder, C.; Paul, V.; Proksch, P., Distribution of secondary metabolites in the sponge *Oceanapia*  
898 *sp.* and its ecological implications. *Mar. Biol.* **1999**, *135*, 573-580.
- 899 44. Freeman, C. J.; Gleason, D. F., Chemical defenses, nutritional quality, and structural components in three  
900 sponge species: *Ircinia felix*, *I. campana*, and *Aplysina fulva*. *Mar. Biol.* **2010**, *157*, 1083-1093.
- 901 45. Roue, M.; Domart-Coulon, I.; Ereskovsky, A.; Dejediat, C.; Pererz, T.; Bourguet-Kondracki, M.-L., Cellular  
902 localization of clathridimine, an antimicrobial 2-aminoimidazole alkaloid produced by the Mediterranean  
903 calcareous sponge *Clathrina clathrus*. *J. Nat. Prod.* **2010**, *73*, 1277-1282.
- 904 46. Furrow, F. B.; Amsler, C. D.; McClintock, J. B.; Baker, B. J., Surface sequestration of chemical feeding  
905 deterrents in the Antarctic sponge *Latrunculia apicalis* as an optimal defense against sea star spongivory.  
906 *Mar. Biol.* **2003**, *143*, 443-449.
- 907 47. Becerro, M. A.; Paul, V. J.; Starmer, J., Intracolony variation in chemical defenses of the sponge *Cacospongia*  
908 *sp.* and its consequences on generalist fish predators and the specialist nudibranch predator *Glossodoris*  
909 *pallida*. *Mar. Ecol. Prog. Ser.* **1998**, *168*, 187-196.
- 910 48. Siriak, T.; Intaraksa, N.; Kaewsuwan, S.; Yuenyongsawad, S.; Suwanborirux, K.; Plubrukarn, A.,  
911 Intracolony allocation of tioxazole macrolides in the sponge *Pachastrissa nux*. *Chem. Biodivers.* **2011**, *8*, 238-  
912 246.
- 913 49. Richardson, A. D.; Aalbersberg, W.; Ireland, C. M., The patellazoles inhibit protein synthesis at nanomolar  
914 concentrations in human colon tumor cells. *Anticancer. Drugs* **2008**, *16*, 533-541.
- 915 50. Kwan, J. C.; Donia, M. S.; Han, A. W.; Hirose, E.; Haygood, M. G.; Schmidt, E. W., Genome streamlining  
916 and chemical defense in a coral reef symbiosis. *Proc. Natl. Acad. Sci. USA* **2012**, *109*, 20655-20660.
- 917 51. Gouiffes, D.; Juge, M.; Grimaud, N.; Welin, L.; Sauviat, M.; Barbin, Y.; Laurent, D.; Roussakis, C.; Henichart,  
918 J.; Verbist, J., Bistramide A, a new toxin from the urochordata *Lissoclinum bistratum* Sluiter: isolation and  
919 preliminary characterization. *Toxicon* **1988**, *26*, 1129-1136.
- 920 52. Schmidt, E. W., The secret to a successful relationship: lasting chemistry between ascidians and their  
921 symbiotic bacteria. *Invertebr. Biol.* **2015**, *134*, 88-102.
- 922 53. Subramani, R.; Aalbersberg, W., Culturable rare Actinomycetes: diversity, isolation and marine natural  
923 product discovery. *Appl. Microbiol. Biotechnol.* **2013**, *97*, 9291-321.
- 924 54. Ziemert, N.; Lechner, A.; Wietz, M.; Millan-Aguinaga, N.; Chavarria, K. L.; Jensen, P. R., Diversity and  
925 evolution of secondary metabolism in the marine actinomycete genus *Salinispora*. *Proc. Natl. Acad. Sci. USA*  
926 **2014**, *111*, E1130-E1139.
- 927 55. Lopera, J.; Miller, I. J.; McPhail, K. L.; Kwan, J. C., Increased biosynthetic gene dosage in a genome-reduced  
928 defensive bacterial symbiont. *mSystems* **2017**, *2*, e00096-17.
- 929 56. Holmstrom, C.; James, S.; Neilan, B. A.; White, D. C.; Kjelleberg, S., *Pseudoalteromonas tunicata* sp. nov., a  
930 bacterium that produces antifouling agents. *Int. J. Syst. Bacteriol.* **1998**, *48*, 1205-1212.
- 931 57. Baker, B. J., *Syνοicum adareanum* sampling u/w video Mar 2011 Palmer Station Antarctica. Dryad, Ed. *Dryad*  
932 *Data*, **2020**. [10.5061/dryad.gxd2547gw](https://doi.org/10.5061/dryad.gxd2547gw).
- 933 58. Massana, R.; Murray, A. E.; Preston, C. M.; DeLong, E. F., Vertical distribution and phylogenetic  
934 characterization of marine planktonic Archaea in the Santa Barbara Channel. *Appl. Environ. Microbiol.* **1997**,  
935 *63*, 50-56.
- 936 59. Caporaso, J. G.; Lauber, C.; Walters, W.; Berg-Lyons, D.; Lozupone, C.; Turnbaugh, P.; Fierer, N.; Knight,  
937 R., Global patterns of 16S rRNA diversity at a depth of millions of sequences per sample. *Proc. Natl. Acad. Sci. USA* **2011**, *108*, 4516-4522.
- 938 60. Bolyen, E.; Rideout, J. R.; Dillon, M. R.; Bokulich, N.; Abnet, C. C.; Al-Ghalith, G. A.; Alexander, H.; Alm,  
939 E. J.; Arumugam, M.; Asnicar, F.; Bai, Y.; Bisanz, J. E.; Bittinger, K.; Brejnrod, A.; Brislawn, C. J.; Brown, C.  
940 T.; Callahan, B. J.; Caraballo-Rodriguez, A. M.; Chase, J.; Cope, E. K.; Da Silva, R.; Diener, C.; Dorrestein, P.  
941 C.; Douglas, G. M.; Durall, D. M.; Duvallet, C.; Edwardson, C. F.; Ernst, M.; Estaki, M.; Fouquier, J.;  
942 Gauglitz, J. M.; Gibbons, S. M.; Gibson, D. L.; Gonzalez, A.; Gorlick, K.; Guo, J. R.; Hillmann, B.; Holmes,  
943 S.; Holste, H.; Huttenhower, C.; Huttley, G. A.; Janssen, S.; Jarmusch, A. K.; Jiang, L. J.; Kaehler, B. D.; Bin  
944 Kang, K.; Keefe, C. R.; Keim, P.; Kelley, S. T.; Knights, D.; Koester, I.; Kosciulek, T.; Kreps, J.; Langille, M.  
945 G. I.; Lee, J.; Ley, R.; Liu, Y. X.; Loftfield, E.; Lozupone, C.; Maher, M.; Marotz, C.; Martin, B. D.; McDonald,  
946 D.; McIver, L. J.; Melnik, A. V.; Metcalf, J. L.; Morgan, S. C.; Morton, J. T.; Naimey, A. T.; Navas-Molina, J.  
947 A.; Nothias, L. F.; Orchanian, S. B.; Pearson, T.; Peoples, S. L.; Petras, D.; Preuss, M. L.; Pruesse, E.;  
948 Rasmussen, L. B.; Rivers, A.; Robeson, M. S.; Rosenthal, P.; Segata, N.; Shaffer, M.; Shiffer, A.; Sinha, R.;  
949 Song, S. J.; Spear, J. R.; Swafford, A. D.; Thompson, L. R.; Torres, P. J.; Trinh, P.; Tripathi, A.; Turnbaugh, P.

- 951 J.; Ul-Hasan, S.; vander Hooft, J. J. J.; Vargas, F.; Vazquez-Baeza, Y.; Vogtmann, E.; von Hippel, M.; Walters,  
952 W.; Wan, Y. H.; Wang, M. X.; Warren, J.; Weber, K. C.; Williamson, C. H. D.; Willis, A. D.; Xu, Z. Z.;  
953 Zaneveld, J. R.; Zhang, Y. L.; Zhu, Q. Y.; Knight, R.; Caporaso, J. G., Reproducible, interactive, scalable and  
954 extensible microbiome data science using QIIME 2. *Nat. Biotechnol.* **2019**, *37*, 852-857.
- 955 61. Callahan, B. J.; McMurdie, P. J.; Rosen, M. J.; Han, A. W.; Johnson, A. J. A.; Holmes, S. P., DADA2: High-  
956 resolution sample inference from Illumina amplicon data. *Nat. Methods* **2016**, *13*, 581-583.
- 957 62. Kumar, S.; Stecher, G.; Tamura, K., MEGA7: Molecular evolutionary genetics analysis version 7.0 for bigger  
958 data sets. *Mol. Biol. Evol.* **2016**, *33*, 1870-1874.
- 959 63. Tackmann, J.; Matias Rodrigues, J. F.; von Mering, C., Rapid inference of direct interactions in large-scale  
960 ecological networks from heterogeneous microbial sequencing data. *Cell Syst.* **2019**, *9*, 286-296 e8.
- 961 64. Bastian, M.; Heymann, S.; Jacomy, M. In Gephi: an open source software for exploring and manipulating  
962 networks. , International AAAI ICWSM Conference on weblogs and social media, San Jose, California,  
963 USA, 2009; San Jose, California, USA.
- 964 65. Cristóbal, E.; Ayuso, S. V.; Justel, A.; Toro, M., Robust optima and tolerance ranges of biological indicators:  
965 a new method to identify sentinels of global warming. *Ecol. Res.* **2013**, *29*, 55-68.
- 966 66. Langfelder, P.; Horvath, S., WGCNA: an R package for weighted correlation network analysis. *BMC*  
967 *Bioinformatics* **2008**, *9*, 559.
- 968 67. Paulson, J. N.; Stine, O. C.; Bravo, H. C.; Pop, M., Differential abundance analysis for microbial marker-  
969 gene surveys. *Nat. Methods* **2013**, *10*, 1200-2.
- 970 68. Markowitz, V. M.; Chen, I.-M. A.; Palaniappan, K.; Chu, K.; Szeto, E.; Grechkin, Y.; Ratner, A.; Jacob, B.;  
971 Huang, J.; Williams, P.; Huntemann, M.; Anderson, I.; Mavromatis, K.; Ivanova, N. N.; Kyrpides, N. C.,  
972 IMG: the integrated microbial genomes database and comparative analysis system. *Nucleic Acids Res.* **2012**,  
973 *40*, D115-22.
- 974 69. Blin, K.; Medema, M. H.; Kottmann, R.; Lee, S. Y.; Weber, T., The antiSMASH database, a comprehensive  
975 database of microbial secondary metabolite biosynthetic gene clusters. *Nucleic Acids Res.* **2017**, *45*, D555-  
976 D559.
- 977

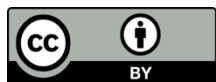

© 2020 by the authors. Submitted for possible open access publication under the terms and conditions of the Creative Commons Attribution (CC BY) license (<http://creativecommons.org/licenses/by/4.0/>).
